# Supplementary material for: Single electron transfer catalysis by diphenylthiourea under visible light photoredox conditions
Source: Royal Society of Chemistry journal article supplement (doi:10.1039/d3qo01189e), 2023-01-01
Supplement: d3qo01189e1.pdf [file d3qo01189e1.pdf]

*Electronic Supplementary Information (ESI) for*

## **Single Electron Transfer Catalysis by Diphenylthiourea Under Visible Light Photoredox Conditions**

Dhananjay Dey<sup>§</sup>, Abhishek Kundu<sup>§</sup>, Monojit Roy, Vikramjeet Singh, Shyamali Maji, and  
Debashis Adhikari\*

*Department of Chemical Sciences, Indian Institute of Science Education and Research Mohali, SAS Nagar-  
140306, India.*

E-mail: [adhikari@iisermohali.ac.in](mailto:adhikari@iisermohali.ac.in)

| <b>Serial No</b> | <b>Table of Content</b>                                       |
|------------------|---------------------------------------------------------------|
| <b>1.</b>        | General consideration                                         |
| <b>2.</b>        | Screening with different bases                                |
| <b>3.</b>        | General procedure for the synthesis of cross-coupled products |
| <b>4.</b>        | Mechanistic investigations                                    |
| <b>5.</b>        | Spectroscopic experiments                                     |
| <b>6.</b>        | Cyclic voltammetry experiment for deprotonated DPTU, <b>7</b> |
| <b>7.</b>        | $E_{o,o}$ calculation for <b>7</b>                            |
| <b>8.</b>        | Analytical data of compounds                                  |
| <b>9.</b>        | $^1\text{H}$ and $^{13}\text{C}$ NMR spectra of compounds     |
| <b>10.</b>       | Crystallographic information                                  |
| <b>11.</b>       | References                                                    |

## 1. General Consideration:

All starting compounds employed in this study were procured from commercial suppliers and were used without further purification. All chemicals were purchased from Sigma Aldrich, Avra, TCI, Alfa Aeser, GLR Innovations. Glassware was dried overnight at 160 °C. Benzene was dried by heating over sodium with benzophenone as an indicator. Solvents such as ether, and acetone were used as received from the commercial suppliers. For thin layer chromatography (TLC), silica aluminium foils with fluorescent indicator 254 nm (from Merck) were used. Column chromatography was performed using SD Fine silica gel 60-120 mesh using a gradient of ethyl acetate and hexane as mobile phase. High-resolution mass spectra were recorded on a Waters QTOF mass spectrometer. <sup>1</sup>H NMR and <sup>13</sup>C NMR spectra were recorded on a 400 MHz Bruker Biospin Advance III FT-NMR spectrometer. Fluorescence quenching experiments were carried out in a Cary Eclipse Fluorescence Spectrofluorometer. UV-Vis was recorded using Varian Cary 60 (Agilent Technologies) spectrophotometer. NMR shifts are reported as delta (δ) units in parts per million (ppm) and coupling constants (J) are reported in Hertz (Hz). The following abbreviations are utilized to describe peak patterns when appropriate: s=singlet, d=doublet, t=triplet, q=quartet, and m=multiplet. Chemical shifts (δ) are quoted to the nearest 0.01 ppm relative to tetramethylsilane (δ 0.00 ppm) in CDCl<sub>3</sub>(δ 7.26 ppm). Carbon chemical shifts are internally referenced to the deuterated solvent signals in CDCl<sub>3</sub> (δ 77.1 ppm).

## 2. Screening with different bases.

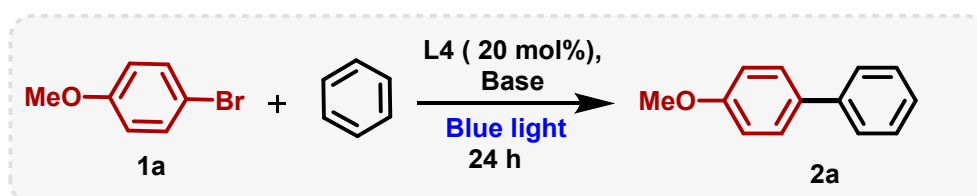

| Entry | L (mol %) | Base (equiv)                | Yield (%) |
|-------|-----------|-----------------------------|-----------|
| 1     | L4 (20)   | NaO <sup>t</sup> Bu (3 eq.) | trace     |
| 2     | L4 (20)   | KOH (3 eq.)                 | -         |
| 3     | L4 (20)   | NaOH (3 eq.)                | -         |
| 4     | L4 (20)   | TEA (3 eq.)                 | -         |
| 5     | L4 (20)   | DIPEA (3 eq.)               | -         |
| 6     | L4 (20)   | Et <sub>3</sub> N (3 eq.)   | -         |

## 3. General procedure for the synthesis of cross-coupled products.

### 3.1. Synthesis of biaryls taking aryl halide as substrates.

In an oven-dried pressure tube aryl bromide (0.5 mmol), KO<sup>t</sup>Bu (1.5 mmol) and diphenylthiourea, **L4** (20 mol%) were added inside a glove box. After that dry benzene (2 mL) was added to the reaction mixture. The reaction mixture was stirred for 24 h under visible light irradiation in an inert atmosphere at room temperature. The reaction flask was placed 7-8 cm away from the LED source. Purification by column chromatography with EtOAc/hexane afforded the corresponding product. The biaryl products were fully characterized by <sup>1</sup>H and <sup>13</sup>C NMR spectroscopies.

### 3.2. Synthesis of cyclic amide taking amido-halides as substrates

An oven-dried Schlenk flask with a magnetic stirring bar was charged with 2-Bromo-N,N-dialkylbenzamide (0.5 mmol), catalyst **L4** (20 mol%) and KO<sup>t</sup>Bu (1.5 mmol) under N<sub>2</sub> atmosphere. 1 ml of dry and degassed THF was added to above reaction mixture. The reaction mixture was stirred under blue light at room temperature for 24 hours. Solvent was removed under rotary evaporator. The desired product was isolated by column chromatography using hexane/ethyl acetate mixture. The pure product was analyzed by NMR spectroscopy.

## 4. Mechanistic investigations

### 4.1. Radical quenching experiment

In an oven-dried pressure tube 4-bromoanisole (1 mmol), KO<sup>t</sup>Bu (3 mmol), **L4** (20 mol%), and TEMPO (2 mmol) were added inside a glove box. After that dry benzene (2 mL) was added to the reaction mixture under an argon atmosphere. The reaction mixture was stirred for 24 h under visible light irradiation in an argon atmosphere at room temperature. The reaction was fully quenched and no desired product was isolated from the reaction mixture.

| Entry | TEMPO (equiv) | Yield (%) |
|-------|---------------|-----------|
| 1.    | 0.5           | 5%        |
| 2.    | 2.0           | -         |

### 4.2. Trapping the radical intermediate:

In an oven-dried pressure tube 4-bromoanisole (1 mmol), KO<sup>t</sup>Bu (3 mmol), **L4** (20 mol%) and TEMPO (0.6 mmol) were added inside a glove box. After that dry benzene (2 mL) was added to the reaction mixture under an inert atmosphere. The reaction mixture was stirred for 24 h under visible light irradiation in an inert atmosphere at room temperature. Then the crude reaction mixture was subjected to HRMS. The desired intermediate was characterised by high-resolution ESI-MS. (M+H<sup>+</sup> = 264.1938).

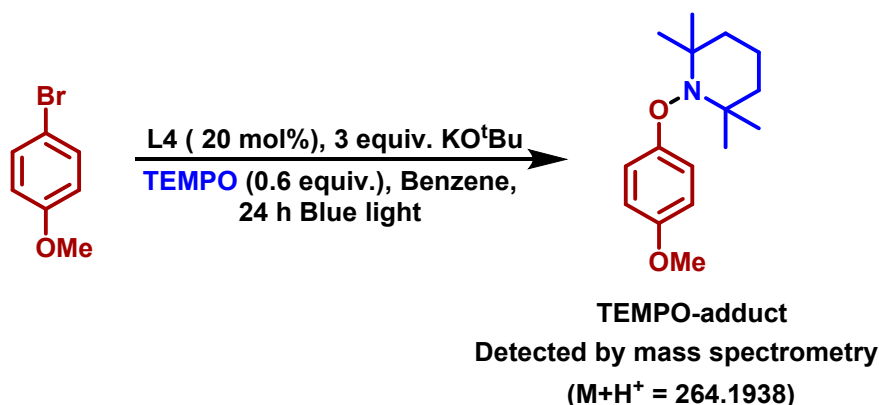

#### 4.3. Reaction of diphenylthiourea with $I_2$ in the presence of $KO^tBu$ .

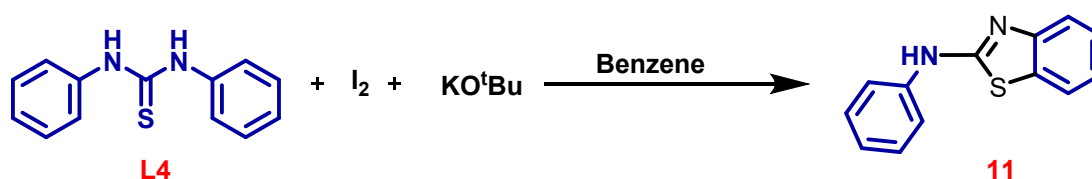

In an oven-dried Schlenk flask, **L4** (1 mmol),  $KO^tBu$  (2.2 mmol), and  $I_2$  (2 mmol) were mixed under an inert atmosphere. After that dry benzene (2 mL) was added to the reaction mixture. The reaction mixture was stirred under visible light irradiation for 24 h under an inert atmosphere at room temperature. After the completion of the reaction, excess  $I_2$  was quenched with saturated sodium thiosulfate solution and the mixture was extracted with EtOAc. Then the resulting solution was dried over  $Na_2SO_4$ , filtered, and concentrated under reduced pressure. Purification by column chromatography with EtOAc/hexane afforded **11** (58%).

$^1H$  NMR (400 MHz,  $CDCl_3$ )  $\delta$  9.34 (s, 1H), 7.63 (dd,  $J = 8.0, 1.2$  Hz, 1H), 7.58 – 7.55 (m, 1H), 7.53 – 7.49 (m, 2H), 7.42 (dd,  $J = 8.5, 7.3$  Hz, 2H), 7.35 – 7.30 (m, 1H), 7.21 – 7.13 (m, 2H)

$^{13}C$  NMR (100 MHz,  $CDCl_3$ )  $\delta$  165.4, 151.4, 140.1, 129.7, 126.3, 124.6, 122.4, 121.0, 120.7, 119.3.

Spectroscopic data matched with the literature.<sup>12</sup>

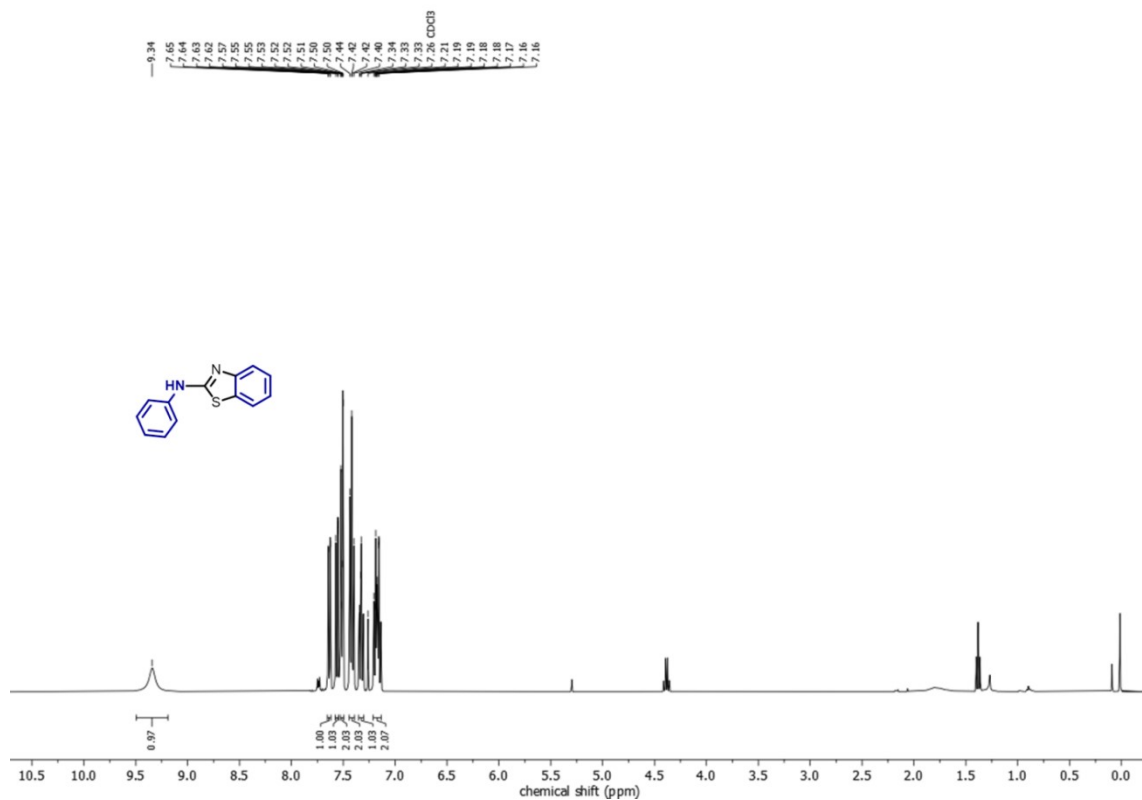

Figure S1. <sup>1</sup>H NMR spectrum (400 MHz) of 11 in CDCl<sub>3</sub>.

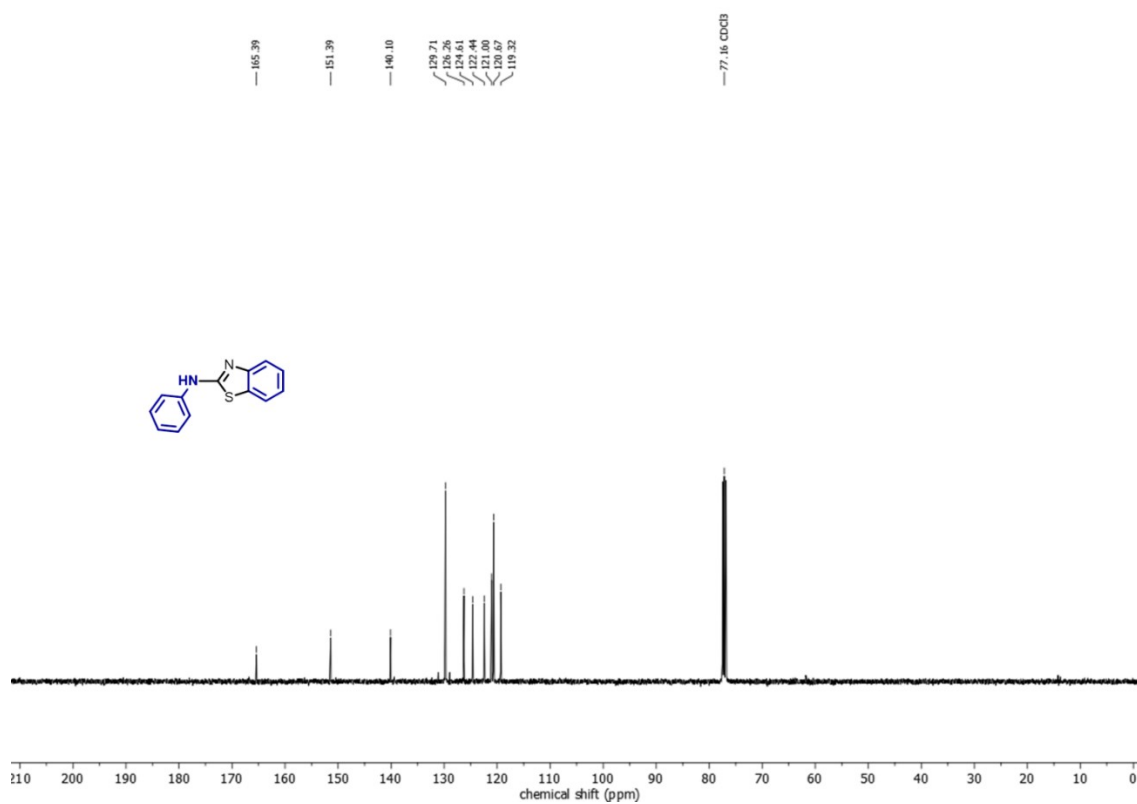

Figure S2. <sup>13</sup>C NMR spectrum (100 MHz) of 11 in CDCl<sub>3</sub>.

#### 4.4. Catalysis with isolated **11**.

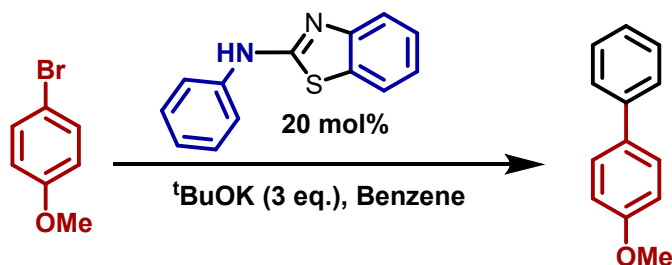

To confirm that **11** is an intermediate species in this electron transfer catalysis, 4-bromoanisole (0.5 mmol),  $\text{KO}^t\text{Bu}$  (1.5 mmol), and **11** (20 mol%) were added to an oven-dried pressure tube along with 2 mL of dry benzene. The reaction mixture was stirred at room temperature for 24 h under visible light irradiation. Column chromatographic purification by EtOAc/hexane mixture afforded the corresponding product in 11% yield.

#### 4.5. Detection of the potential single electron donor species.

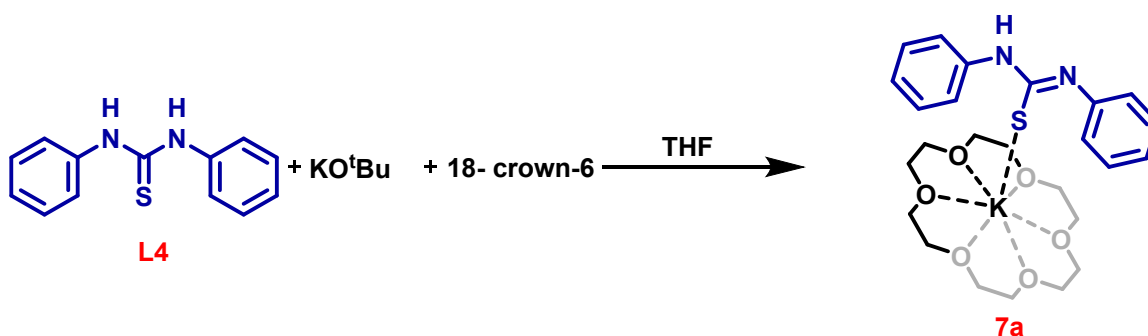

In a 10 ml reaction vial **L4** (1 mmol),  $\text{KO}^t\text{Bu}$  (1.1 mmol), and 18-crown-6 (1.1 mmol) were charged under the inert atmosphere of a glove box. 5 ml THF was added to the mixture and stirred for 20 mins. The stir bar was removed and the solution was kept at room temperature. After four days the solution afforded pale yellowish needle-shaped crystals.

## 5. Spectroscopic experiments:

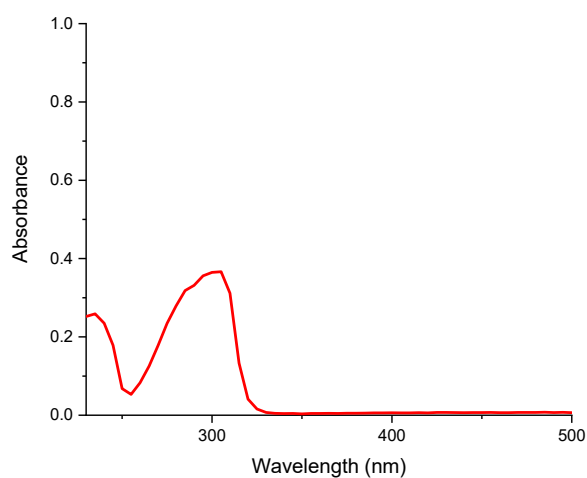

**Figure S3.** UV-visible spectra of **L4** ( $10^{-4}$  M) in MeCN.

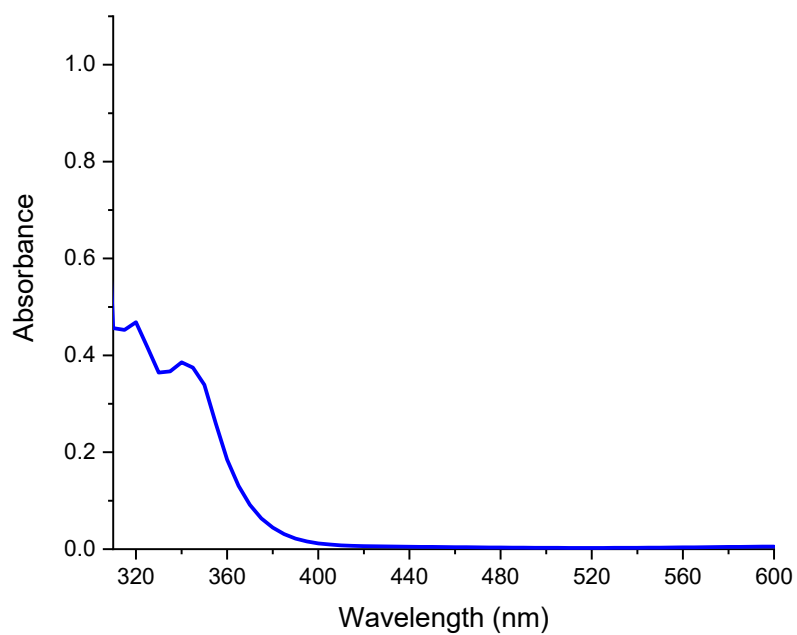

**Figure S4.** UV-visible spectra of deprotonated DPTU, **7** ( $10^{-4}$  M) in MeCN.

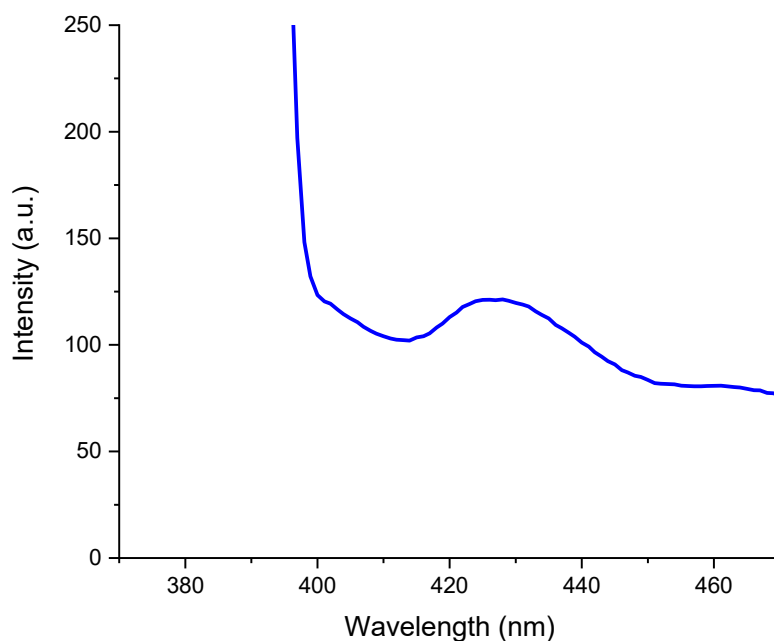

**Figure S5.** Emission spectra of deprotonated DPTU, **7** ( $10^{-4}$  M) in MeCN (excitation wavelength = 380 nm).

The Stern-Volmer experiment was not successful for the overlapping emission band of L4 anion with 11 anion.

## 6. Cyclic voltammetry experiment for deprotonated DPTU, **7**

We attempted to determine the oxidation potential of deprotonated DPTU (**7**) by cyclic voltammetry. To prepare deprotonated L4, 2.28 mg of N,N'-Diphenylthiourea and 3 mg of KH (30 % w/w in mineral oil) were taken in 1 mL of dry MeCN and stirred for 10 min. Then the solution was filtered through PTFE filter. Then 19 mL MeCN solution of 0.1 M (nBu<sub>4</sub>N)PF<sub>6</sub> was added to the filtrate as the supporting electrolyte. To evaluate the ground-state oxidation, a three-electrode set-up was used where glassy carbon was the working electrode, a Pt wire as the counter and Ag/AgCl containing 2 M KCl solution as the reference electrode, respectively. The shown voltammogram (Figure S4) was collected with a scan rate of 100 mV sec<sup>-1</sup>. The peak positions for the anodic and cathodic waves were internally referenced with respect to Fc<sup>+</sup>/Fc couple.



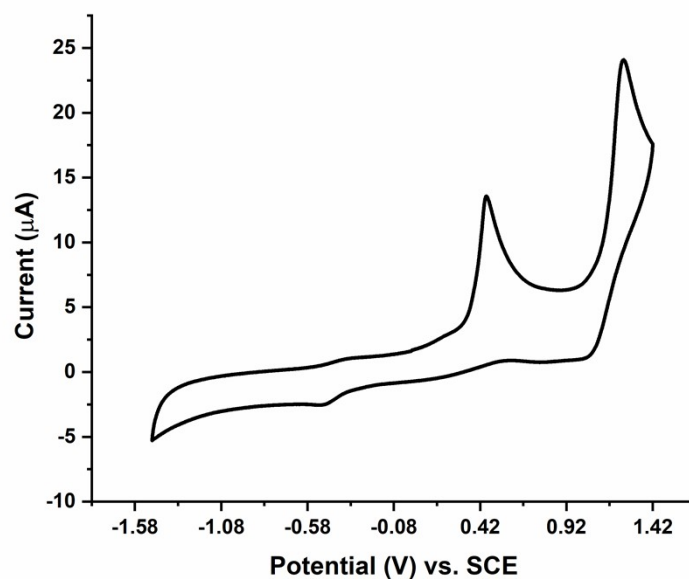

**Figure S6.** CV of 1 mM of **7** dissolved in acetonitrile along with 0.1 M solution of tetrabutylammonium hexafluorophosphate salt as an electrolyte.

#### 7. $E_{0,0}$ calculation for **7**.

Excitation wavelength = 380 nm

Emission max = 428 nm

Average wavelength = 404 nm

$$E_{0,0} = 1240/404 \text{ eV} = 3.07 \text{ eV}$$

$$E^*_{\text{ox}} = E_{\text{ox}} - E_{0,0}$$

$$E^*_{\text{ox}} = 0.53 - 3.07 = -2.54 \text{ V vs SCE}$$

#### 8. Analytical data

##### 4-methoxy-1,1'-biphenyl (**2a**):

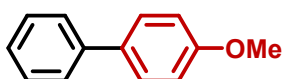

The compound was purified by column chromatography (silica gel 60–120 mesh) with hexane to give the product as a colourless solid (yield: 82 mg, 89%).  $^1\text{H}$  NMR (400 MHz,  $\text{CDCl}_3$ )  $\delta$  7.55 (t,  $J = 8.2$  Hz, 4H), 7.43 (t,  $J = 7.7$  Hz, 2H), 7.31 (t,  $J = 7.4$  Hz, 1H), 6.99 (d,  $J = 8.7$  Hz, 2H), 3.86 (s, 3H).  $^{13}\text{C}$  NMR (100 MHz,  $\text{CDCl}_3$ )  $\delta$  159.2, 141.0, 133.9, 128.9, 128.3, 126.9, 126.8, 114.3, 55.5. Spectroscopic data matched with the literature.<sup>1</sup>

#### 4-methyl-1,1'-biphenyl (2b):

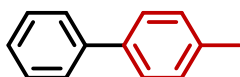

The compound was purified by column chromatography (silica gel 60–120 mesh) with hexane to give the product as a colourless solid (yield: 71 mg, 85%). <sup>1</sup>H NMR (400 MHz, CDCl<sub>3</sub>) δ 7.59 (d, *J* = 8.1 Hz, 2H), 7.50 (d, *J* = 8.1 Hz, 2H), 7.43 (t, *J* = 7.6 Hz, 2H), 7.33 (t, *J* = 7.3 Hz, 1H), 7.26 (d, *J* = 8.1 Hz, 2H), 2.40 (s, 3H). <sup>13</sup>C NMR (100 MHz, CDCl<sub>3</sub>) δ 141.3, 138.5, 137.2, 129.6, 128.8, 127.1, 127.1, 21.2. Spectroscopic data matched with the literature.<sup>2</sup>

#### biphenyl (2c):

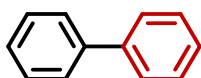

The compound was purified by column chromatography (silica gel 60–120 mesh) with hexane to give the product as a colourless solid (yield: 66 mg, 86 %). <sup>1</sup>H NMR (400 MHz, CDCl<sub>3</sub>) δ 7.71 – 7.63 (m, 2H), 7.51 (q, *J* = 7.6 Hz, 2H), 7.42 (d, *J* = 5.7 Hz, 1H). <sup>13</sup>C NMR (100 MHz, CDCl<sub>3</sub>) δ 141.4, 128.9, 128.9, 127.4, 127.3, 127.3. Spectroscopic data matched with the literature<sup>1</sup>.

#### [1,1'-biphenyl]-4-carbonitrile (2d) :

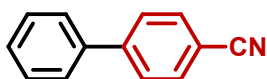

The compound was purified by column chromatography (silica gel 60–120 mesh) with hexane to give the product as a colourless solid (yield: 79 mg, 88%). <sup>1</sup>H NMR (400 MHz, CDCl<sub>3</sub>) δ 7.75 – 7.67 (m, 4H), 7.61 – 7.57 (m, 2H), 7.51 – 7.46 (m, 2H), 7.46 – 7.41 (m, 1H). <sup>13</sup>C NMR (100 MHz, CDCl<sub>3</sub>) δ 145.8, 139.3, 132.7, 128.8, 127.8, 127.3, 119.1, 111.0. Spectroscopic data matched with the literature.<sup>3</sup>

#### 4-(trifluoromethyl)-1,1'-biphenyl (2e) :

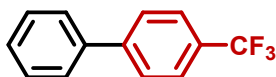

The compound was purified by column chromatography (silica gel 60–120 mesh) with hexane to give the product as a colourless solid (yield: 87 mg, 78 %). <sup>1</sup>H NMR (400 MHz, CDCl<sub>3</sub>) δ 7.71 (s, 4H), 7.64 – 7.59 (m, 2H), 7.49 (t, *J* = 7.4 Hz, 2H), 7.42 (t, *J* = 7.3 Hz, 1H). <sup>13</sup>C NMR (100 MHz, CDCl<sub>3</sub>) δ 144.9, 139.9, 129.1, 128.3, 127.6, 127.4, 125.9, 125.9, 125.8, 125.8. <sup>19</sup>F NMR (376 MHz, CDCl<sub>3</sub>): δ -62.3. Spectroscopic data matched with the literature.<sup>4</sup>

#### 2-fluoroy-1,1'-biphenyl (2f):

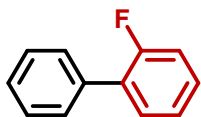

The compound was purified by column chromatography (silica gel 60–120 mesh) with hexane to give the product as a colourless solid (yield: 65 mg, 75%).  $^1\text{H}$  NMR (400 MHz,  $\text{CDCl}_3$ )  $\delta$  7.57 (d,  $J = 7.6$  Hz, 2H), 7.47 (t,  $J = 7.6$  Hz, 3H), 7.36 (dt,  $J = 24.6, 6.4$  Hz, 2H), 7.25 – 7.12 (m, 2H).  $^{13}\text{C}$  NMR (100 MHz,  $\text{CDCl}_3$ )  $\delta$  158.7, 136.0, 130.9, 130.9, 129.3, 129.2, 129.2, 129.1, 129.0, 128.6, 127.8, 124.5, 124.5, 116.3, 116.1.  $^{19}\text{F}$  NMR (376 MHz,  $\text{CDCl}_3$ ):  $\delta$  -115.9. Spectroscopic data matched with the literature.<sup>5</sup>

### 2-methoxy-3-phenylpyridine (2g):

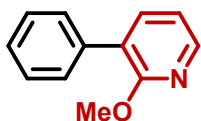

The compound was purified by column chromatography (silica gel 60–120 mesh) with hexane to give the product as a colourless solid (yield: 66 mg, 71%).  $^1\text{H}$  NMR (400 MHz,  $\text{CDCl}_3$ )  $\delta$  8.21 (dd,  $J = 5.0, 2.0$  Hz, 1H), 7.65 – 7.58 (m, 3H), 7.46 (t,  $J = 7.5$  Hz, 2H), 7.39 (t,  $J = 7.3$  Hz, 1H), 6.99 (dd,  $J = 7.3, 5.0$  Hz, 1H), 4.02 (s, 3H).  $^{13}\text{C}$  NMR (100 MHz,  $\text{CDCl}_3$ )  $\delta$  160.9, 145.8, 138.6, 136.8, 129.2, 128.3, 127.6, 124.7, 117.1, 53.6, 53.5. Spectroscopic data matched with the literature.<sup>6</sup>

### 3-phenylthiophene (2h):

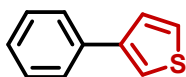

The compound was purified by column chromatography (silica gel 60–120 mesh) with hexane to give the product as a colourless solid (yield: 58 mg, 72%).  $^1\text{H}$  NMR (400 MHz,  $\text{CDCl}_3$ )  $\delta$  7.72 – 7.63 (m, 2H), 7.52 – 7.50 (m, 1H), 7.49 – 7.41 (m, 4H), 7.40 – 7.33 (m, 1H).  $^{13}\text{C}$  NMR (100 MHz,  $\text{CDCl}_3$ )  $\delta$  142.4, 135.9, 128.9, 127.2, 126.6, 126.4, 126.3, 120.4. Spectroscopic data matched with the literature.<sup>7</sup>

### 2-isopropyl-3,3-dimethylisoindolin-1-one (4a)

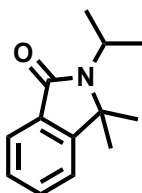

The compound was purified by column chromatography (silica gel) with 10 % mixture of ethyl acetate in hexane to give the product as a white solid (68 mg, 65%).  $^1\text{H}$  NMR (400 MHz,  $\text{CDCl}_3$ )  $\delta$  7.74 (d,  $J = 7.5$  Hz, 1H), 7.47 (t,  $J = 7.5$  Hz, 1H), 7.37 (t,  $J = 7.4$  Hz, 1H), 7.31 (d,  $J = 7.6$  Hz, 1H), 3.62 (hept,  $J = 6.8$  Hz, 1H), 1.53 (d,  $J = 6.9$  Hz, 6H), 1.44 (s, 6H).  $^{13}\text{C}$  NMR (101 MHz,  $\text{CDCl}_3$ )  $\delta$  167.25, 151.32,

132.04, 131.29, 127.88, 123.17, 120.67, 63.32, 44.56, 25.49, 20.54. Spectroscopic data matched with the literature.<sup>8</sup>

### 2,3,3-trimethylisoindolin-1-one (4b)

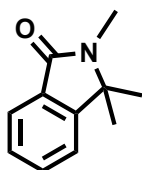

The compound was purified by column chromatography (silica gel) with 10 % mixture of ethyl acetate in hexane to give the product as a white solid (55 mg, 63%). <sup>1</sup>H NMR (400 MHz, CDCl<sub>3</sub>) δ 7.79 (d, *J* = 7.2 Hz, 1H), 7.50 (t, *J* = 6.8 Hz, 1H), 7.39 (t, *J* = 7.3 Hz, 2H), 3.00 (s, 3H), 1.42 (s, 6H). <sup>13</sup>C NMR (101 MHz, CDCl<sub>3</sub>) δ 167.25, 151.56, 131.50, 130.93, 127.99, 123.55, 120.72, 62.10, 24.96, 23.88. Spectroscopic data matched with the literature.<sup>9</sup>

### 2-benzyl-3,3-dimethylisoindolin-1-one (4c)

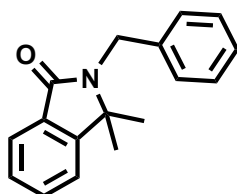

The compound was purified by column chromatography (silica gel) with 10 % mixture of ethyl acetate in hexane to give the product as a white solid (67 mg, 55%). <sup>1</sup>H NMR (400 MHz, CDCl<sub>3</sub>) δ 7.89 (d, *J* = 8.6 Hz, 1H), 7.56 – 7.50 (m, 1H), 7.44 (t, *J* = 6.9 Hz, 1H), 7.36 (d, *J* = 7.5 Hz, 3H), 7.28 (t, *J* = 7.3 Hz, 2H), 7.22 (d, *J* = 7.2 Hz, 1H), 4.75 (s, 2H), 1.35 (s, 6H). <sup>13</sup>C NMR (101 MHz, CDCl<sub>3</sub>) δ 167.90, 151.95, 138.68, 131.79, 130.40, 128.46, 128.02, 127.75, 127.17, 123.80, 120.68, 63.18, 42.63, 26.33. Spectroscopic data matched with the literature.<sup>8</sup>

### 5-fluoro-2-isopropyl-3,3-dimethylisoindolin-1-one (4d)

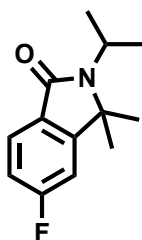

The compound was purified by column chromatography (silica gel) with 10 % mixture of ethyl acetate in hexane to give the product as a white solid (79 mg, 72%). <sup>1</sup>H NMR (400 MHz, CDCl<sub>3</sub>) δ 7.74 (dd, *J* = 8.3, 5.1 Hz, 1H), 7.12 – 7.06 (m, 1H), 7.01 (dd, *J* = 8.2, 2.2 Hz, 1H), 3.62 (hept, *J* = 6.8 Hz, 1H), 1.54 (d, *J* = 6.9 Hz, 6H), 1.47 (s, 6H). <sup>13</sup>C NMR (101 MHz, CDCl<sub>3</sub>) δ 166.37, 163.81 (<sup>1</sup>J<sub>C-F</sub> = 251 Hz), 153.73 (<sup>3</sup>J<sub>C-F</sub> = 9 Hz), 128.09 (<sup>4</sup>J<sub>C-F</sub> = 2 Hz), 125.35 (<sup>3</sup>J<sub>C-F</sub> = 9 Hz), 115.54 (<sup>2</sup>J<sub>C-F</sub> = 24 Hz), 108.29 (<sup>2</sup>J<sub>C-F</sub> = 23 Hz), 63.08, 44.83, 25.52, 20.63. <sup>19</sup>F NMR (376 MHz, CDCl<sub>3</sub>): δ -108.1

Spectroscopic data matched with the literature.<sup>10</sup>

### 1,3,3-trimethylindolin-2-one (6a)

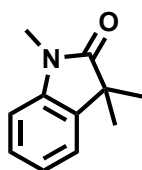

The compound was purified by column chromatography (silica gel) with 5 % mixture of ethyl acetate in hexane to give the product as a colorless oil (63 mg, 73%). <sup>1</sup>H NMR (400 MHz, CDCl<sub>3</sub>) δ 7.29 – 7.23 (m, 1H), 7.20 (d, *J* = 6.1 Hz, 1H), 7.06 (t, *J* = 7.5 Hz, 1H), 6.84 (d, *J* = 7.7 Hz, 1H), 3.22 (s, 3H), 1.37 (s, 6H). <sup>13</sup>C NMR (101 MHz, CDCl<sub>3</sub>) δ 181.50, 142.75, 135.95, 127.77, 122.59, 122.37, 108.12, 44.29, 26.32, 24.49. Spectroscopic data matched with the literature.<sup>11</sup>

### 5-methoxy-1,3,3-trimethylindolin-2-one (6b)

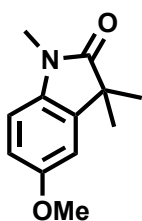

The compound was purified by column chromatography (silica gel) with 10 % mixture of ethyl acetate in hexane to give the product as a colorless oil (72 mg, 70%). <sup>1</sup>H NMR (400 MHz, CDCl<sub>3</sub>) δ 6.81 (d, *J* = 2.3 Hz, 1H), 6.77 (dd, *J* = 8.4, 2.4 Hz, 1H), 6.73 (d, *J* = 8.4 Hz, 1H), 3.79 (s, 3H), 3.17 (s, 3H), 1.34 (s, 6H). <sup>13</sup>C NMR (101 MHz, CDCl<sub>3</sub>) δ 181.10, 156.15, 137.32, 136.23, 111.63, 110.14, 108.31, 55.87, 44.69, 26.35, 24.49. Spectroscopic data matched with the literature.<sup>11</sup>

### 1,3,3,5-tetramethylindolin-2-one (6c)

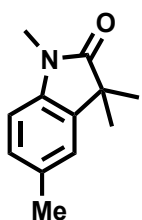

The compound was purified by column chromatography (silica gel) with 5 % mixture of ethyl acetate in hexane to give the product as a yellow oil (63 mg, 68%). <sup>1</sup>H NMR (400 MHz, CDCl<sub>3</sub>) δ 7.06 (d, *J* = 7.8 Hz, 1H), 7.03 (s, 1H), 6.73 (d, *J* = 7.8 Hz, 1H), 3.19 (s, 3H), 2.35 (s, 3H), 1.36 (s, 6H). <sup>13</sup>C NMR (101 MHz, CDCl<sub>3</sub>) δ 181.47, 140.38, 136.02, 132.11, 127.95, 123.29, 107.85, 44.35, 26.35, 24.54. Spectroscopic data matched with the literature.<sup>11</sup>

### 5-chloro-1,3,3-trimethylindolin-2-one (6d)

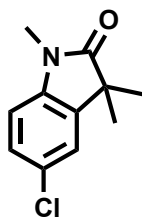

The compound was purified by column chromatography (silica gel) with 5 % mixture of ethyl acetate in hexane to give the product as a yellow solid (75 mg, 72%). <sup>1</sup>H NMR (400 MHz, CDCl<sub>3</sub>) δ 7.22 (dd, *J* = 8.3, 2.1 Hz, 1H), 7.17 (d, *J* = 2.1 Hz, 1H), 6.75 (d, *J* = 8.2 Hz, 1H), 3.19 (s, 3H), 1.35 (s, 6H). <sup>13</sup>C NMR (101 MHz, CDCl<sub>3</sub>) δ 180.91, 141.31, 137.58, 127.97, 127.67, 123.04, 109.05, 44.57, 26.44, 24.38. Spectroscopic data matched with the literature.<sup>11</sup>

## 9. $^1\text{H}$ and $^{13}\text{C}$ NMR spectra of compounds

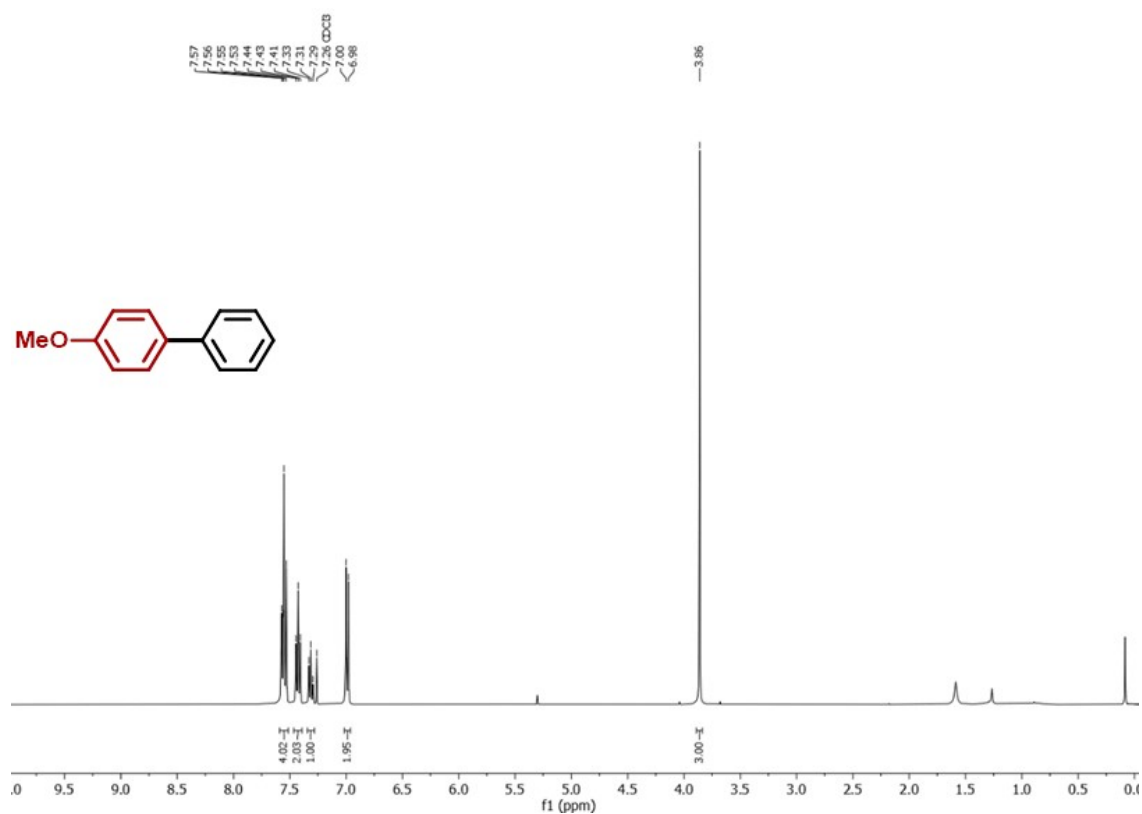

Figure S7.  $^1\text{H}$  NMR spectrum (400 MHz) of 2a in  $\text{CDCl}_3$ .

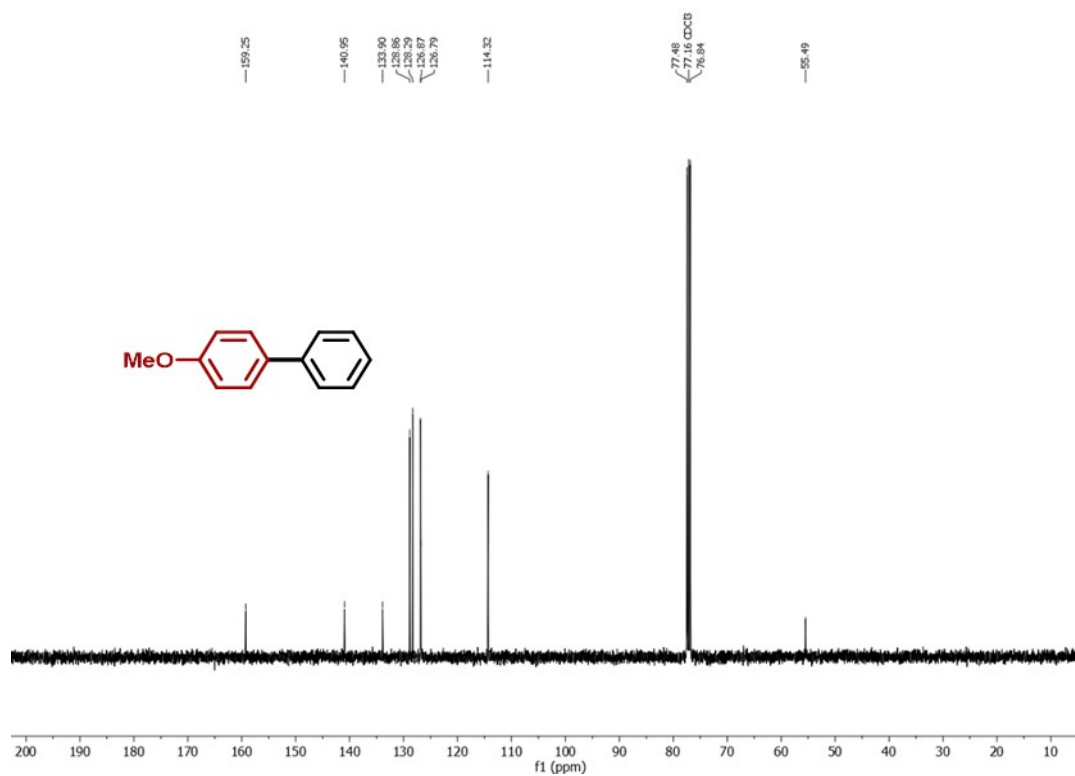

Figure S8.  $^{13}\text{C}$  NMR spectrum (100 MHz) of 2a in  $\text{CDCl}_3$ .

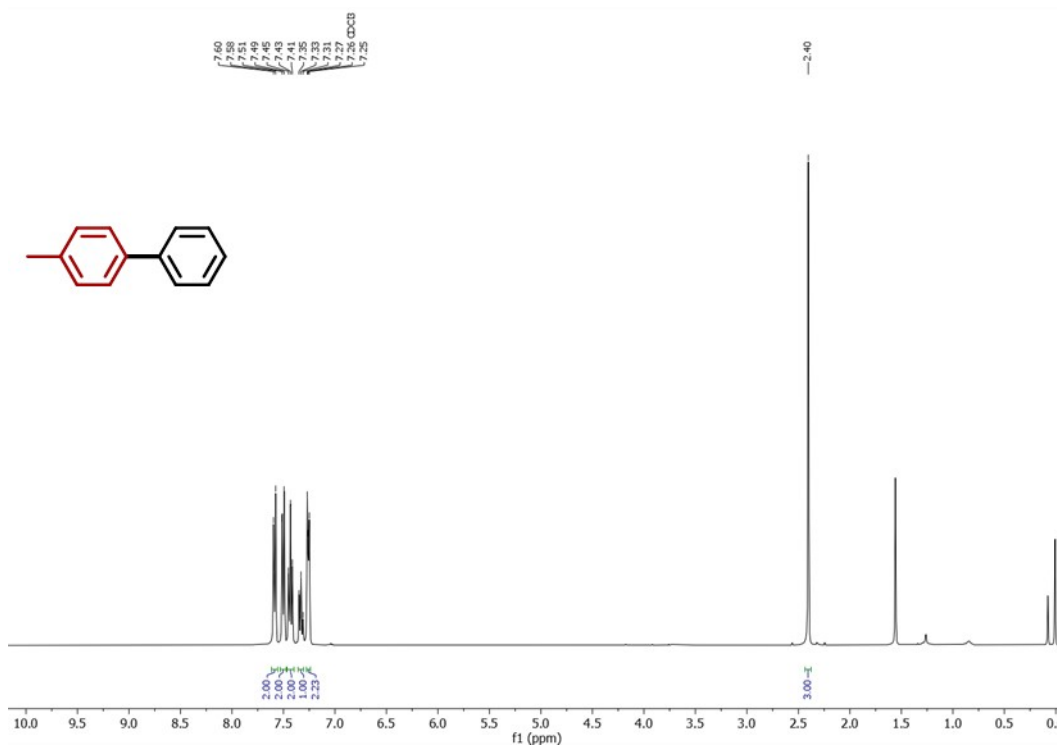

**Figure S9.** <sup>1</sup>H NMR spectrum (400 MHz) of **2b** in CDCl<sub>3</sub>.

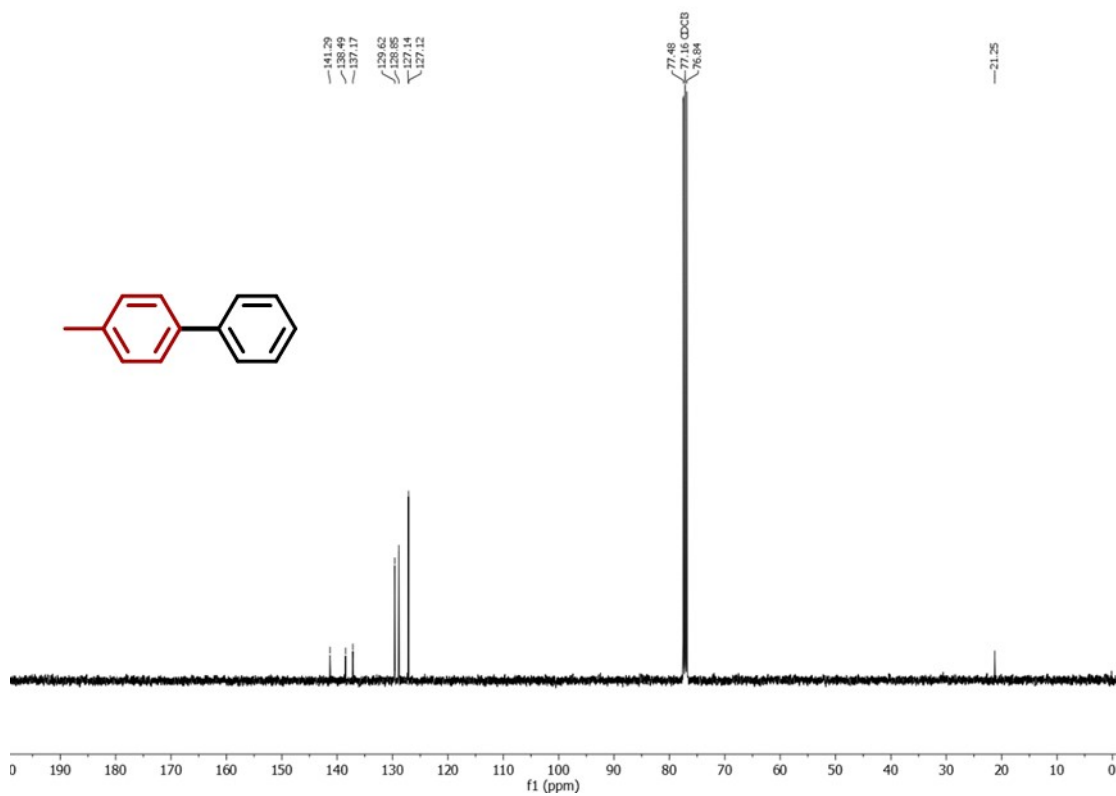

**Figure S10.** <sup>13</sup>C NMR spectrum (100 MHz) of **2b** in CDCl<sub>3</sub>.



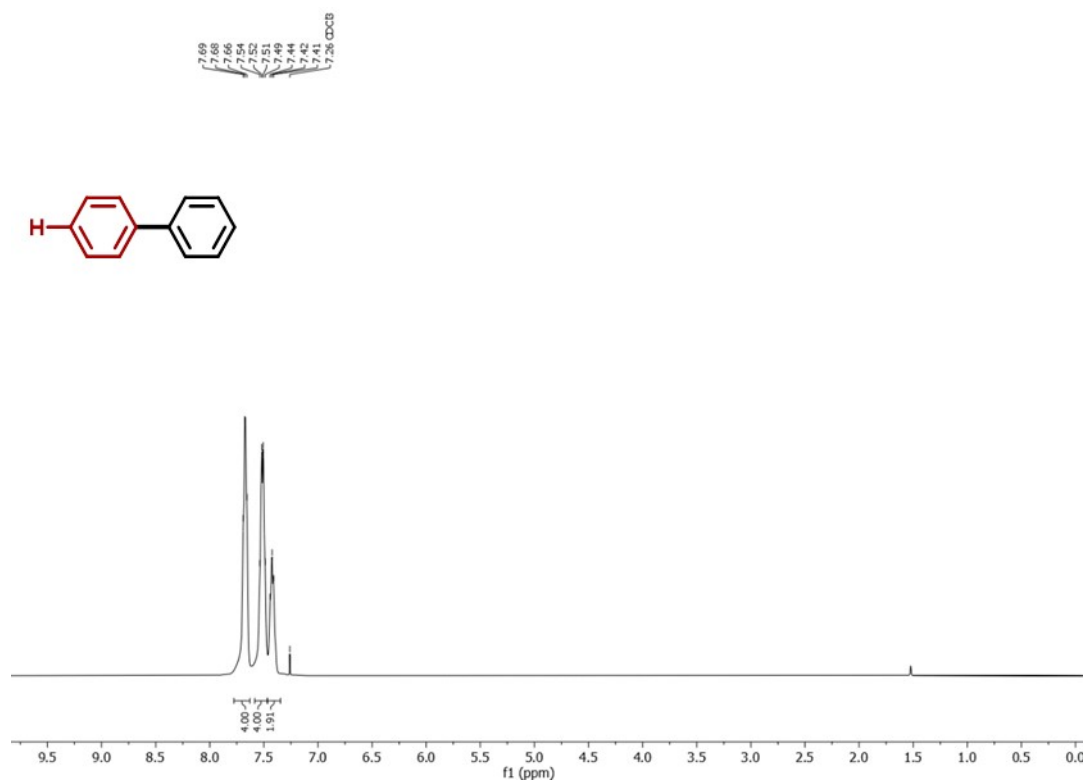

**Figure S11.**  $^1\text{H}$  NMR spectrum (400 MHz) of 2c in  $\text{CDCl}_3$ .

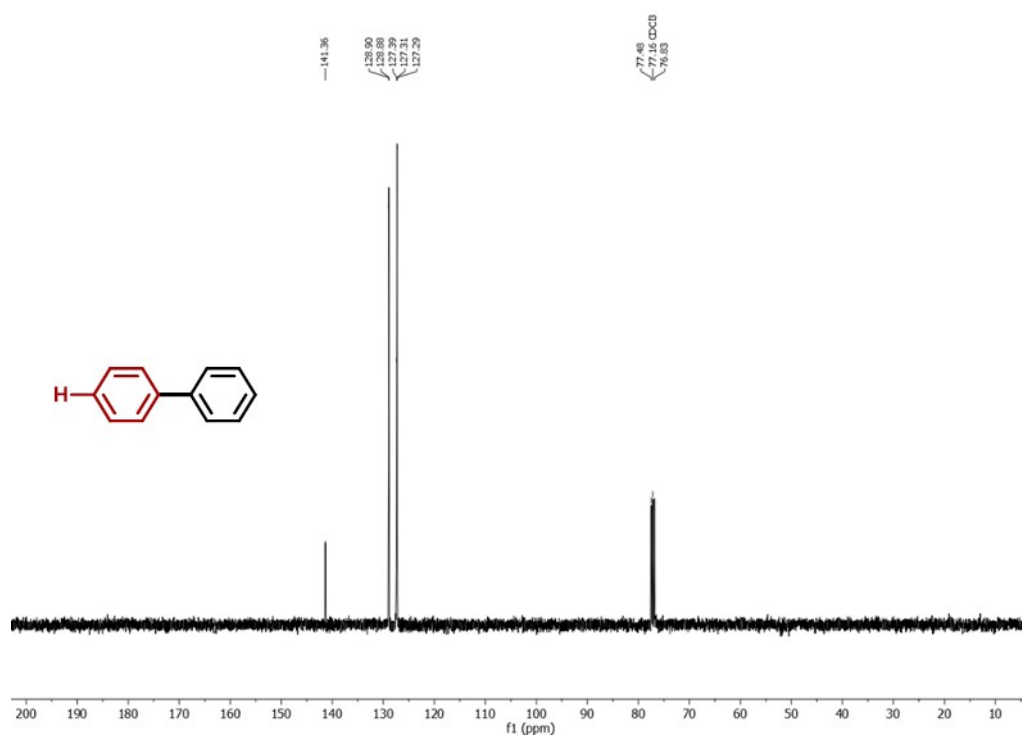

**Figure S12.**  $^{13}\text{C}$  NMR spectrum (100 MHz) of 2c in  $\text{CDCl}_3$ .

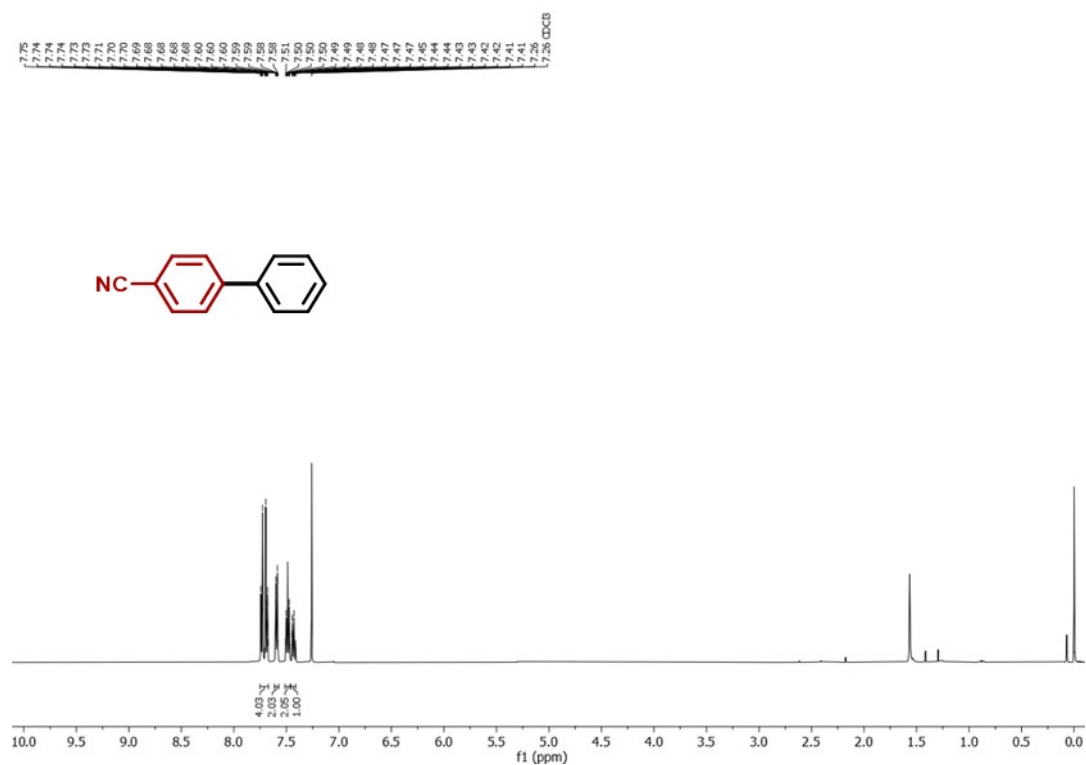

Figure S13. <sup>1</sup>H NMR spectrum (400 MHz) of 2d in CDCl<sub>3</sub>.

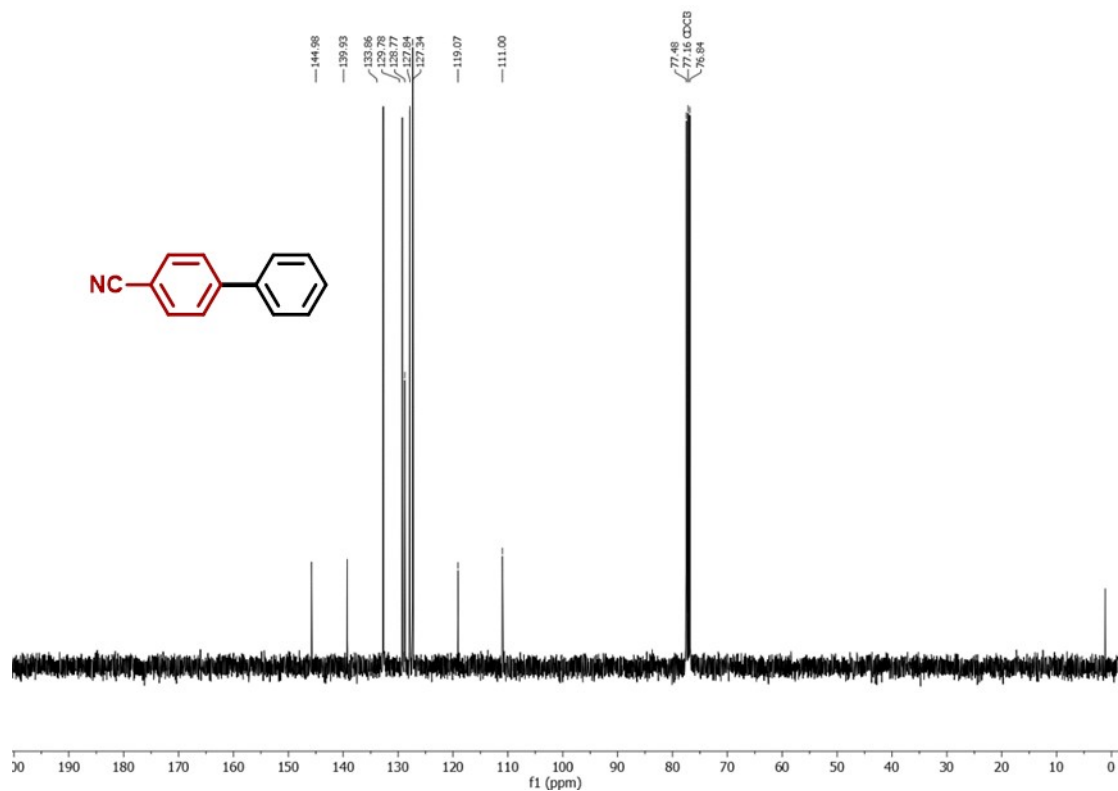

Figure S14. <sup>13</sup>C NMR spectrum (100 MHz) of 2d in CDCl<sub>3</sub>.

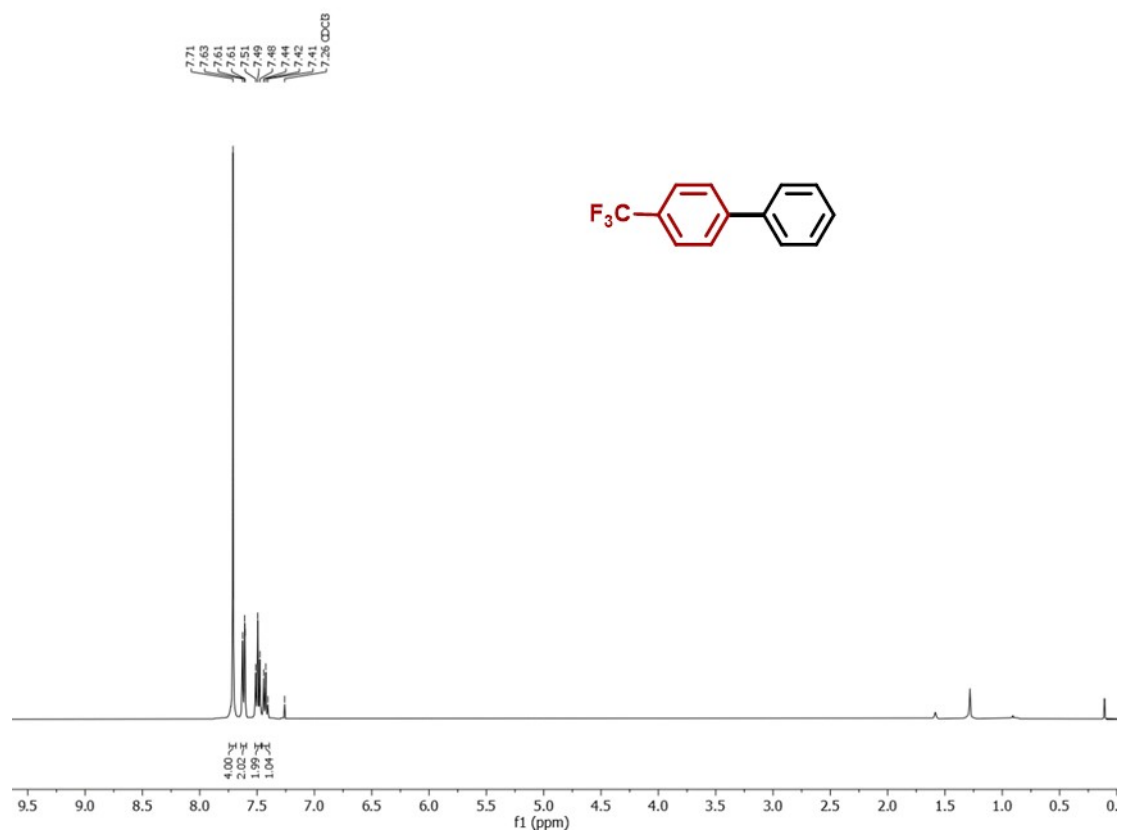

Figure S15. <sup>1</sup>H NMR spectrum (400 MHz) of 2e in CDCl<sub>3</sub>.

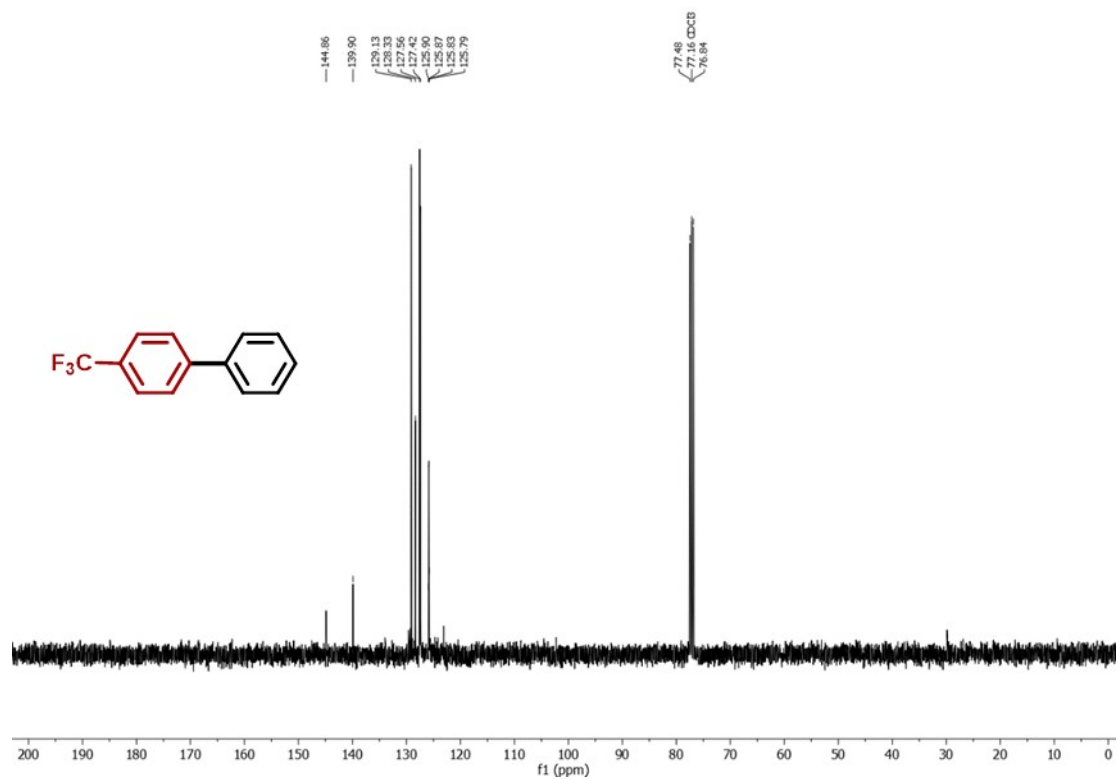

Figure S16. <sup>13</sup>C NMR spectrum (100 MHz) of 2e in CDCl<sub>3</sub>.

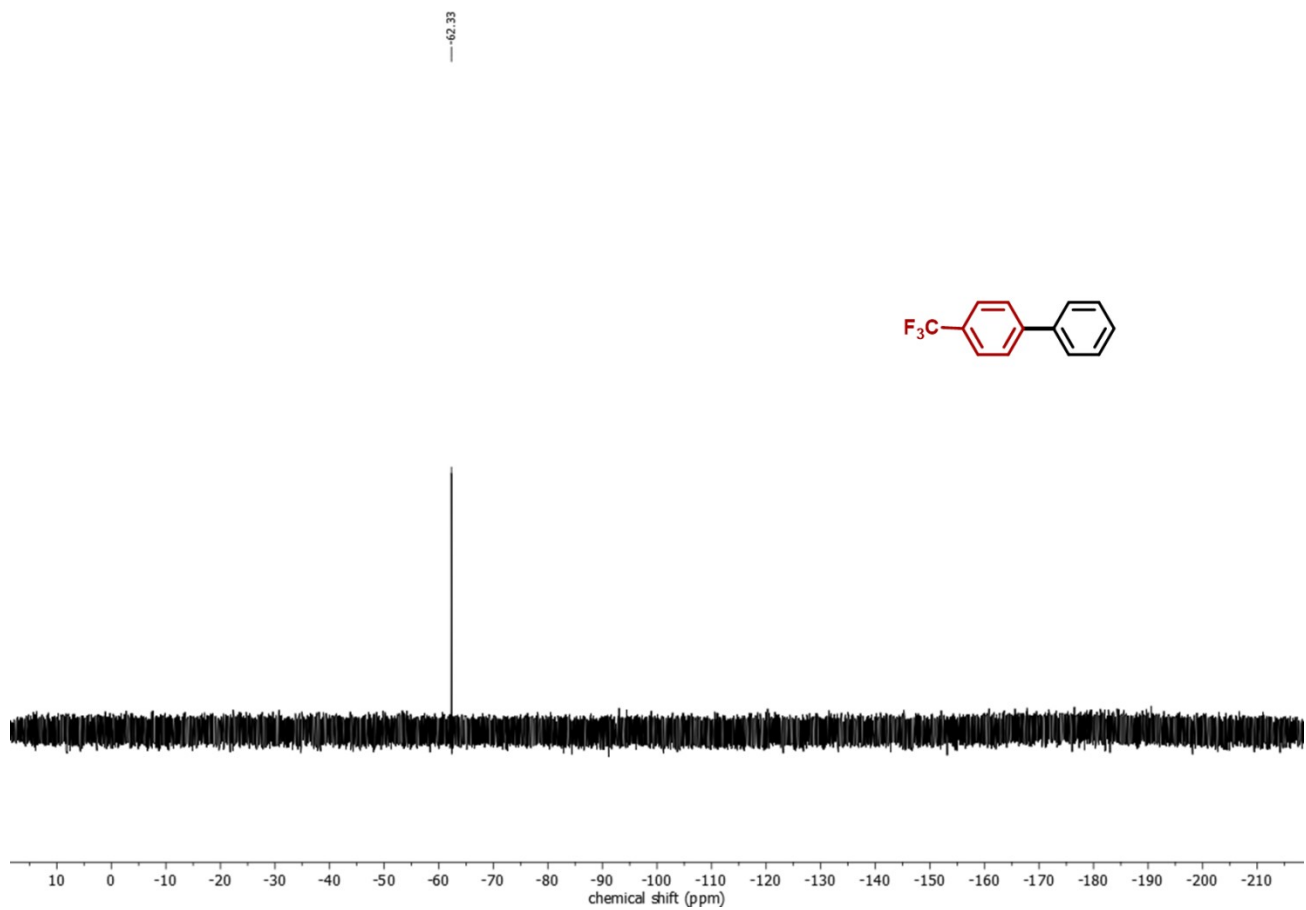

**Figure S17.**  $^{19}\text{F}$  NMR spectrum (376 MHz) of **2e** in  $\text{CDCl}_3$ .

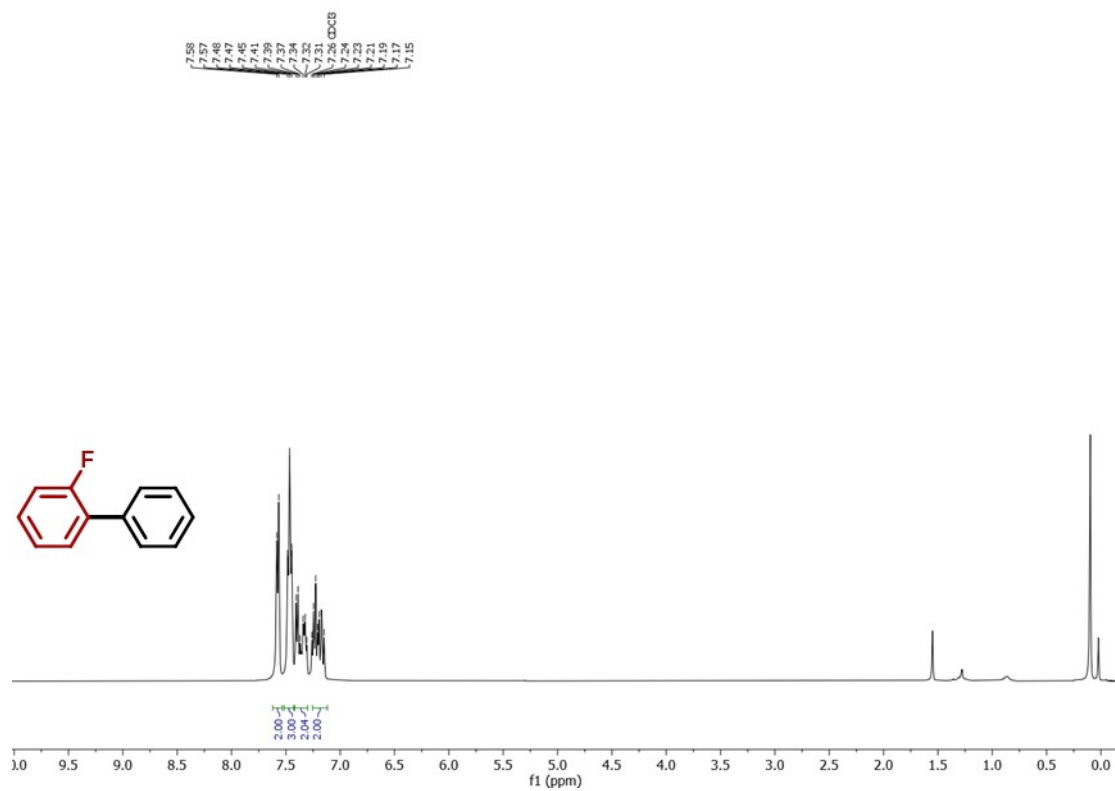

**Figure S18.**  $^1\text{H}$  NMR spectrum (400 MHz) of **2f** in  $\text{CDCl}_3$ .

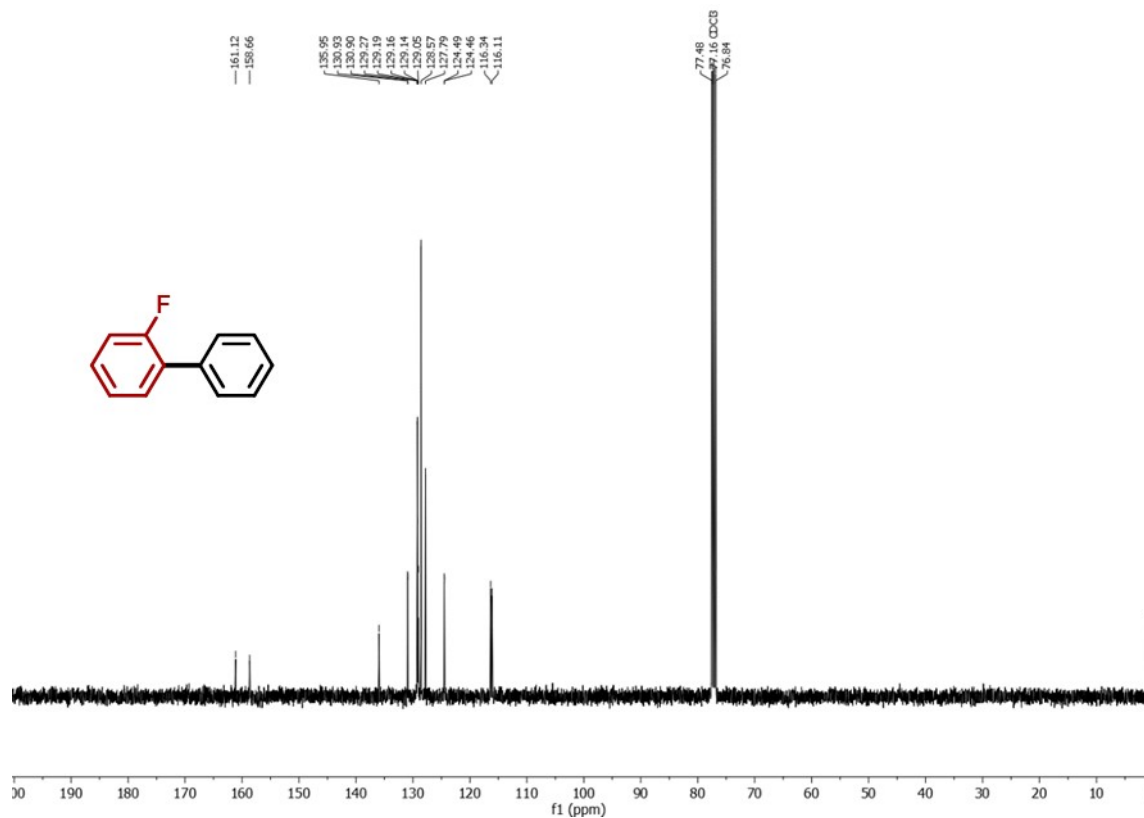

Figure S19.  $^{13}\text{C}$  NMR spectrum (100 MHz) of **2f** in  $\text{CDCl}_3$ .

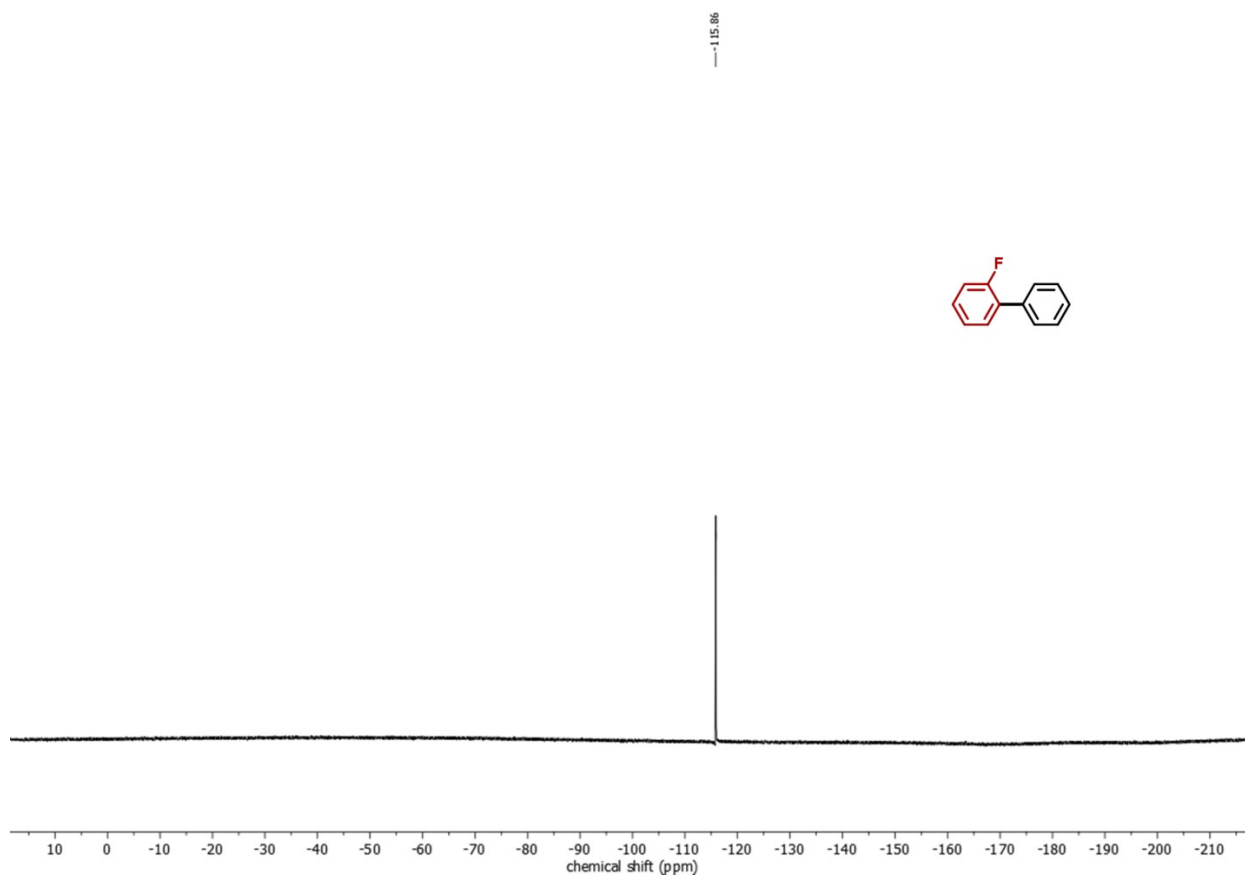

Figure S20.  $^{19}\text{F}$  NMR spectrum (376 MHz) of **2f** in  $\text{CDCl}_3$ .

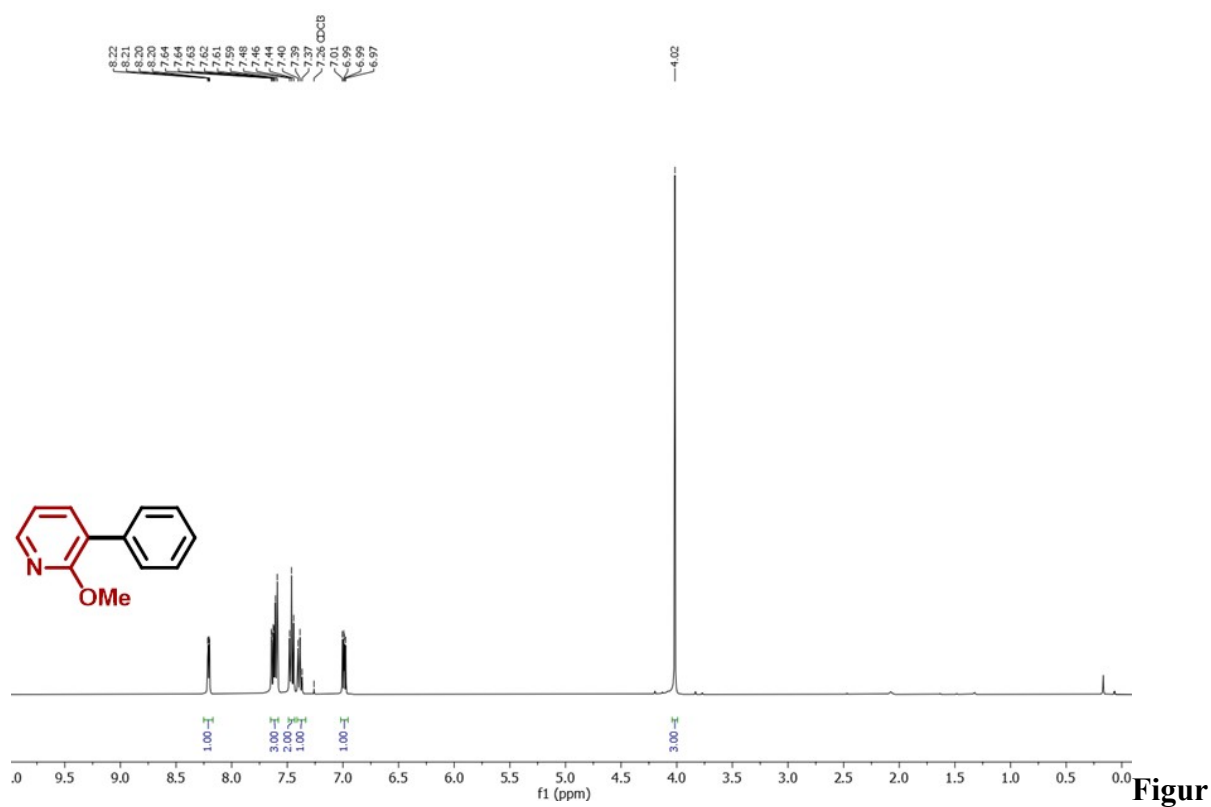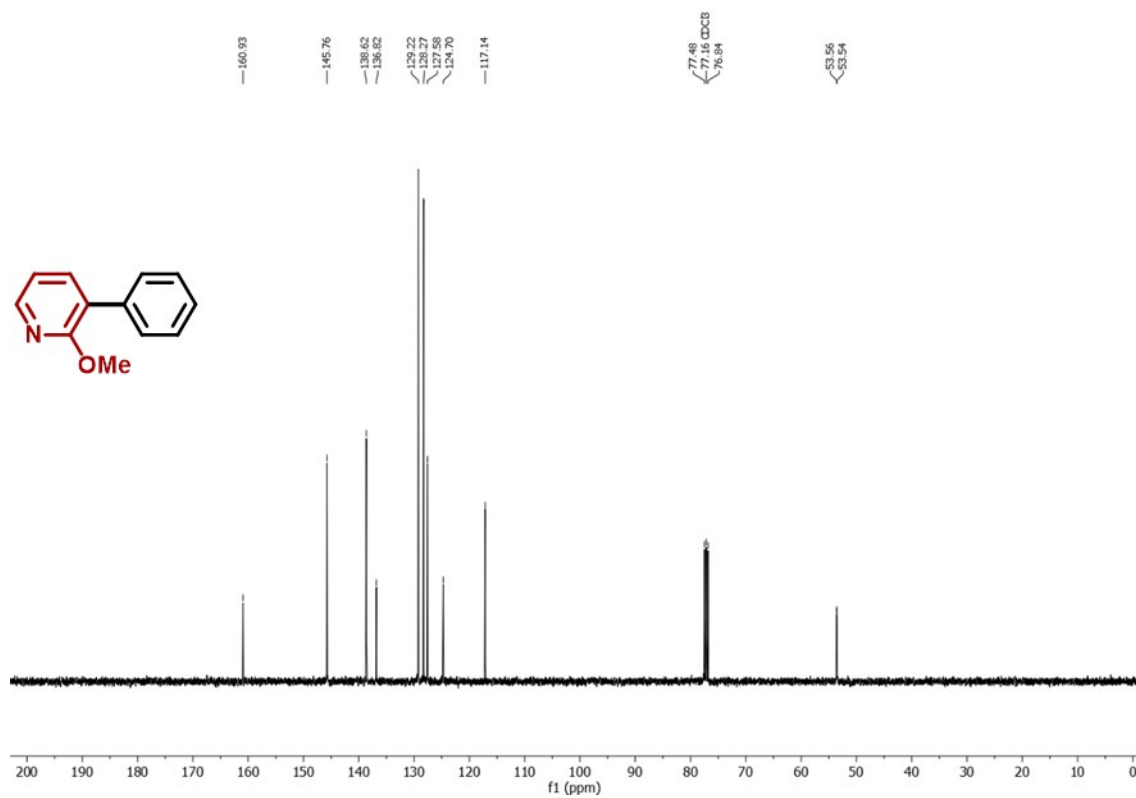

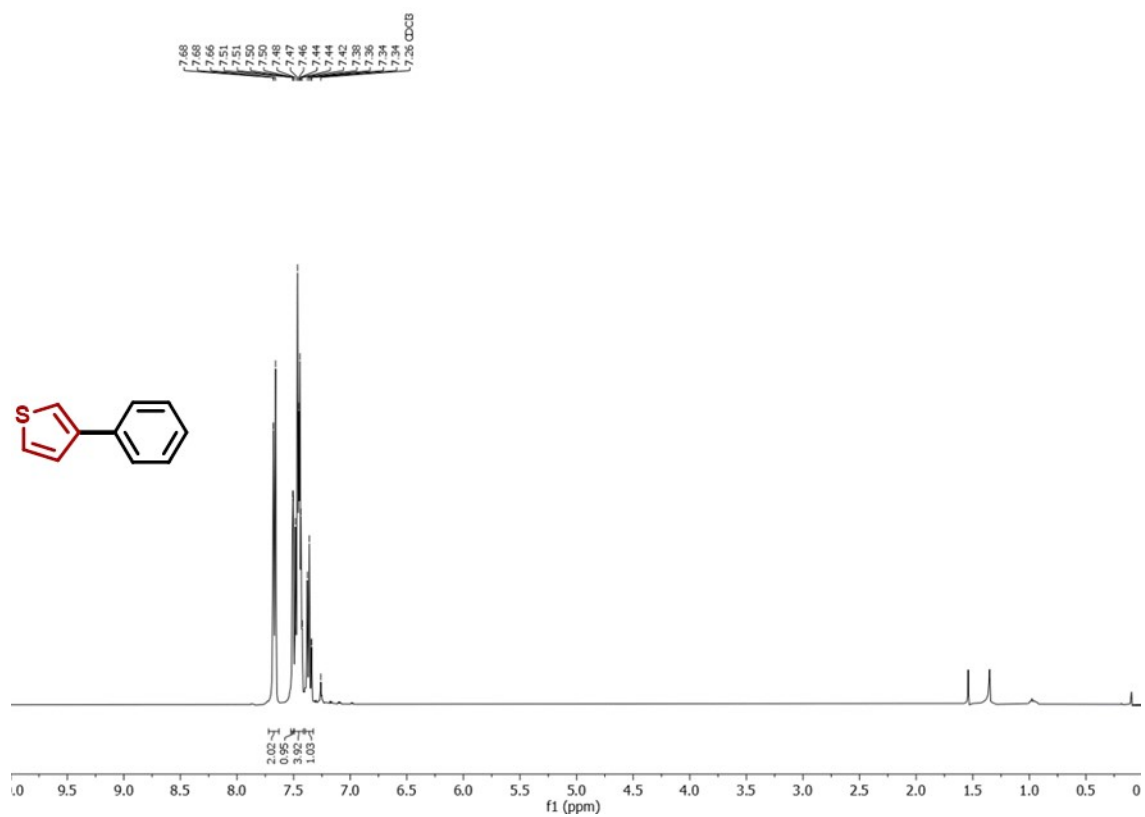

Figure S23. <sup>1</sup>H NMR spectrum (400 MHz) of 2h in CDCl<sub>3</sub>.

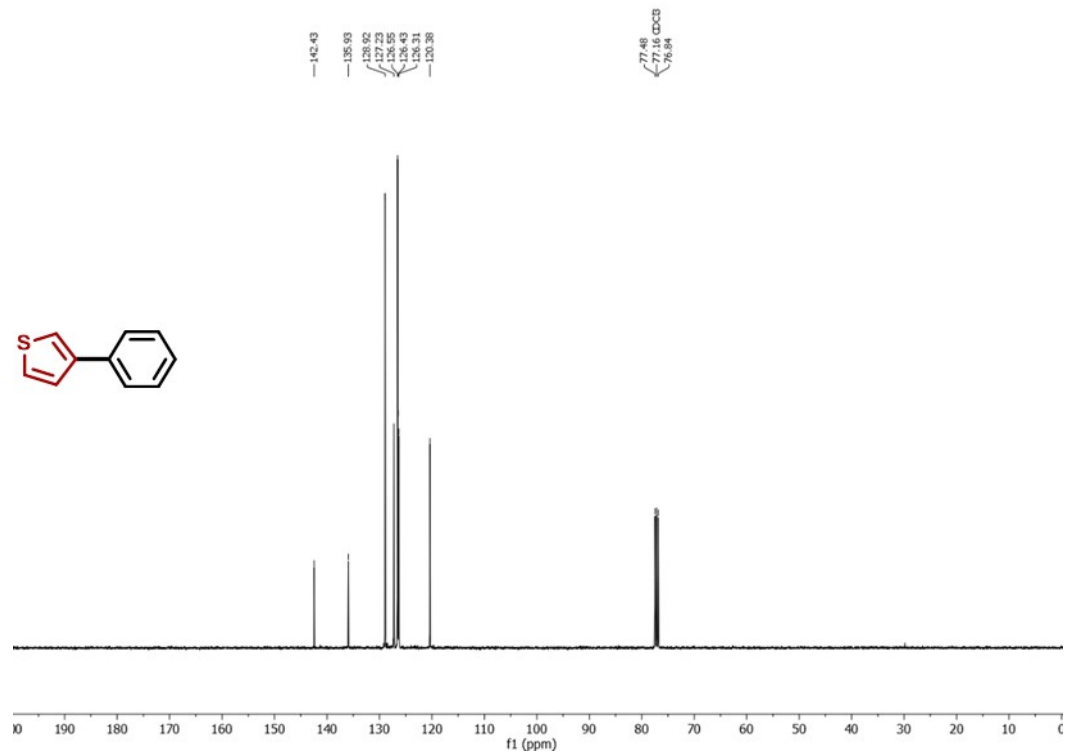

Figure S24. <sup>13</sup>C NMR spectrum (100 MHz) of 2h in CDCl<sub>3</sub>.

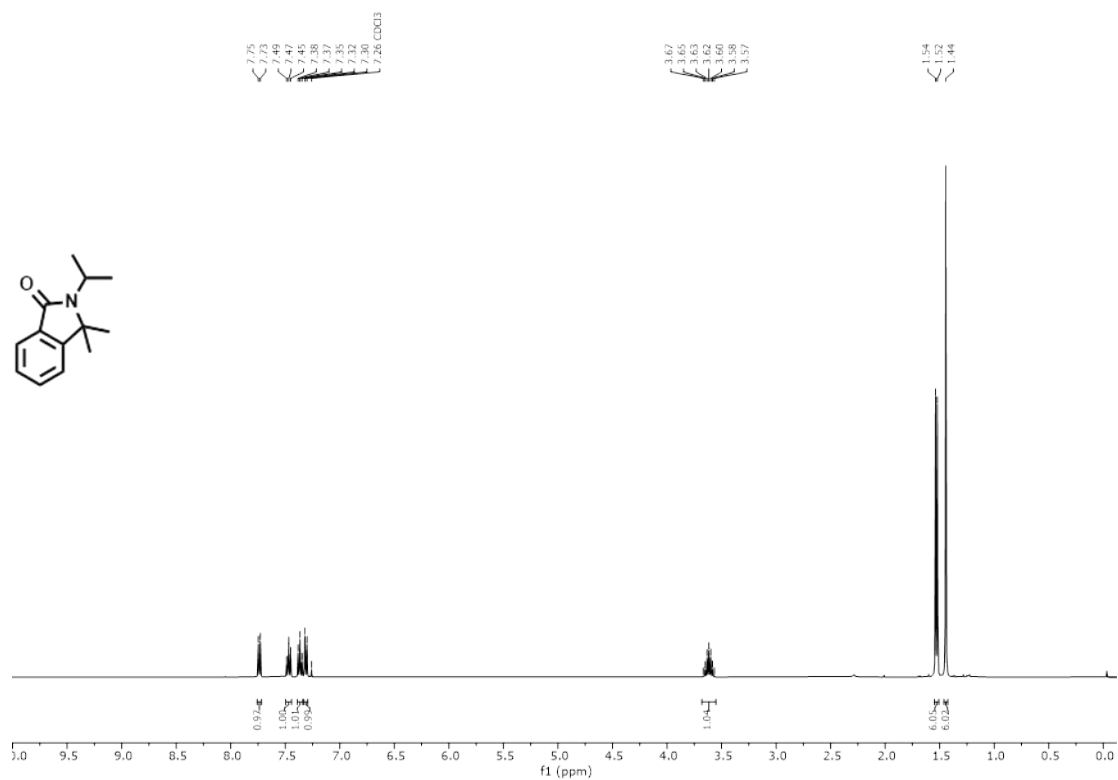

**Figure S25.** <sup>1</sup>H NMR spectrum (400 MHz) of 4a in CDCl<sub>3</sub>.

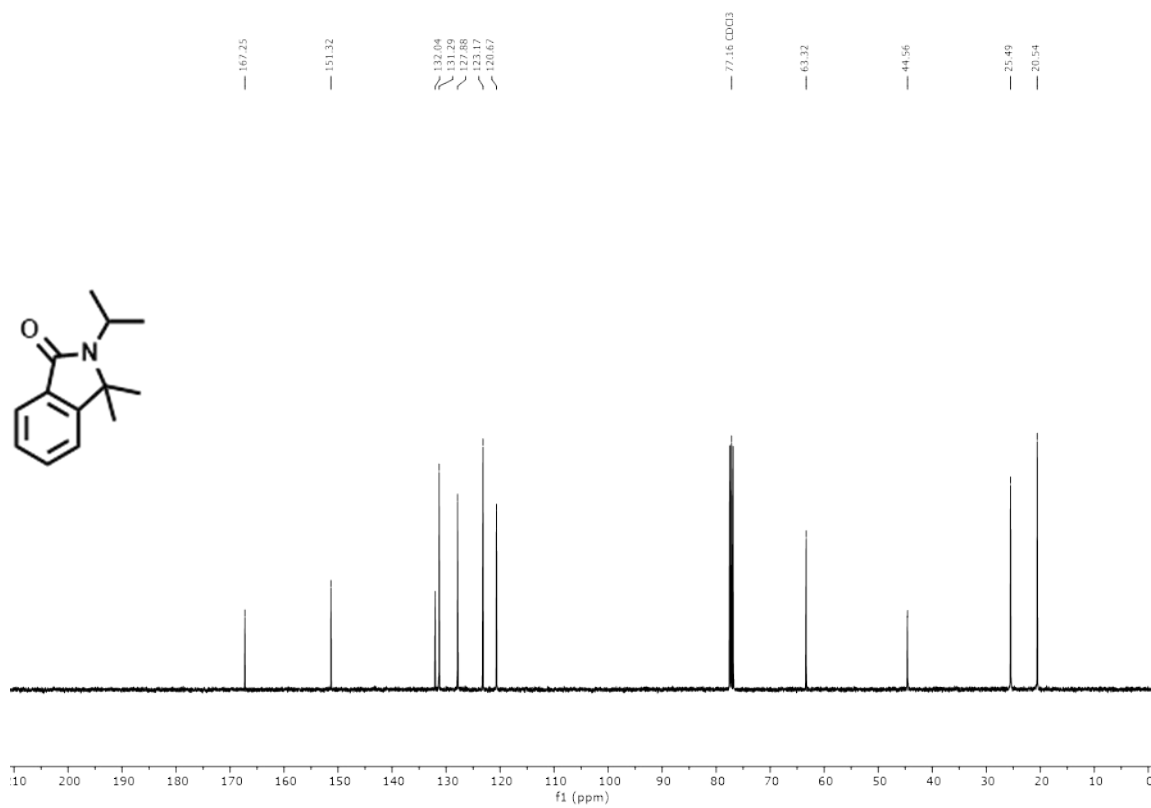

**Figure S26.** <sup>13</sup>C NMR spectrum (100 MHz) of 4a in CDCl<sub>3</sub>.



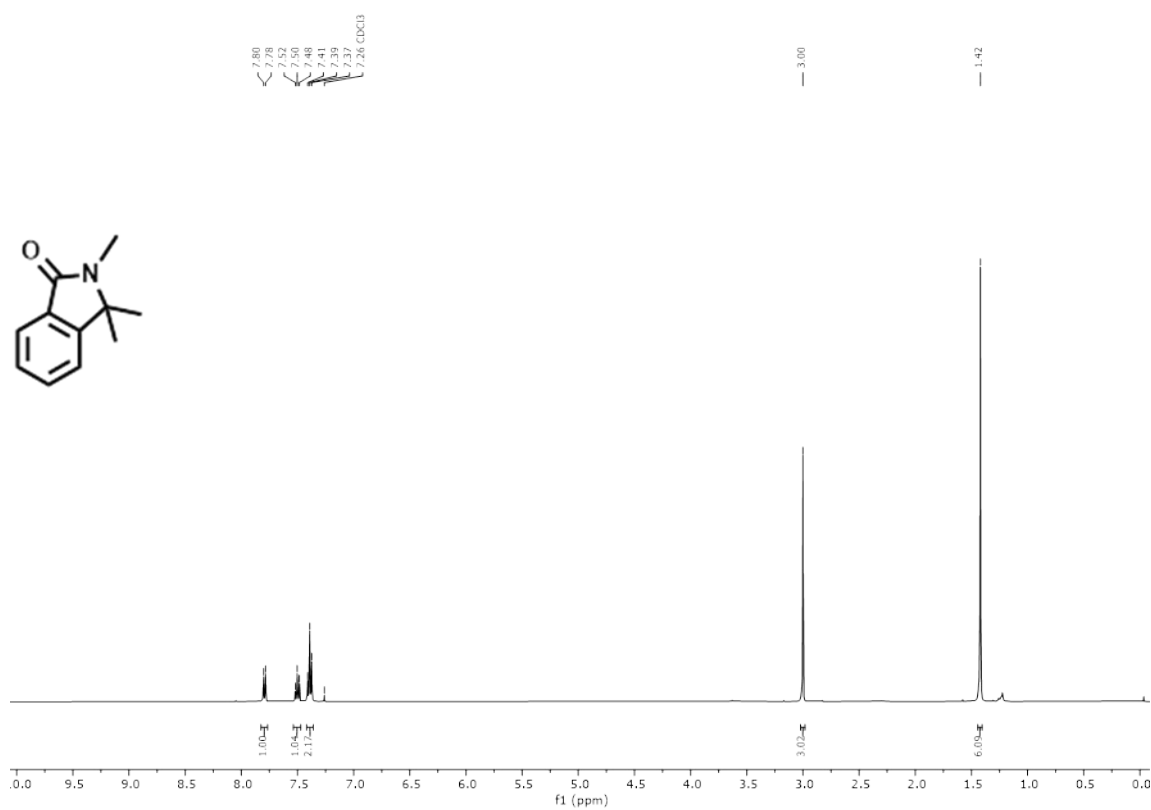

Figure S27. <sup>1</sup>H NMR spectrum (400 MHz) of **4b** in CDCl<sub>3</sub>.

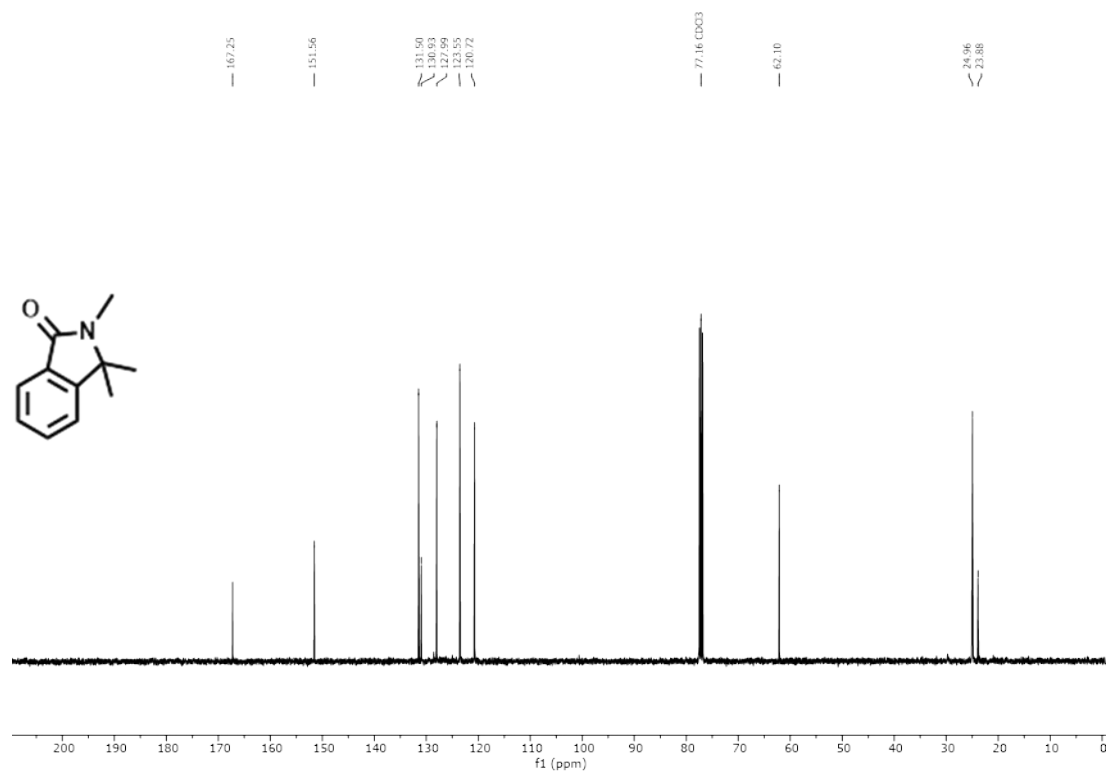

Figure S28. <sup>13</sup>C NMR spectrum (100 MHz) of **4b** in CDCl<sub>3</sub>.

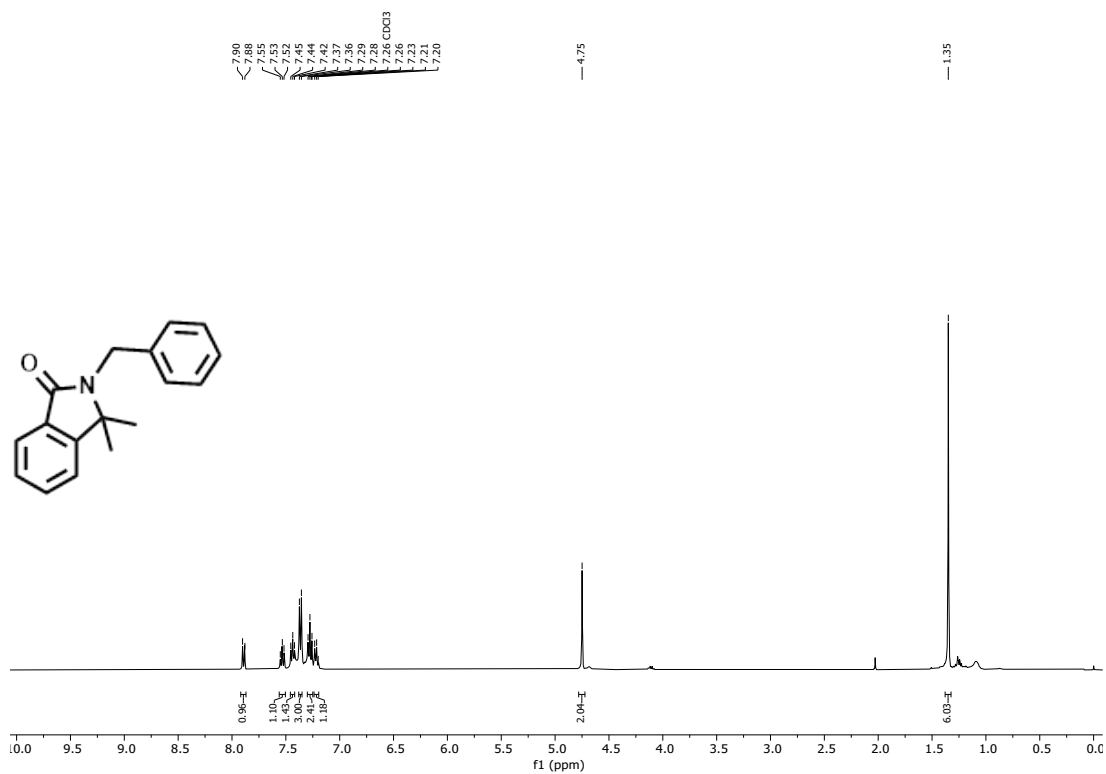

Figure S29. <sup>1</sup>H NMR spectrum (400 MHz) of 4c in CDCl<sub>3</sub>.

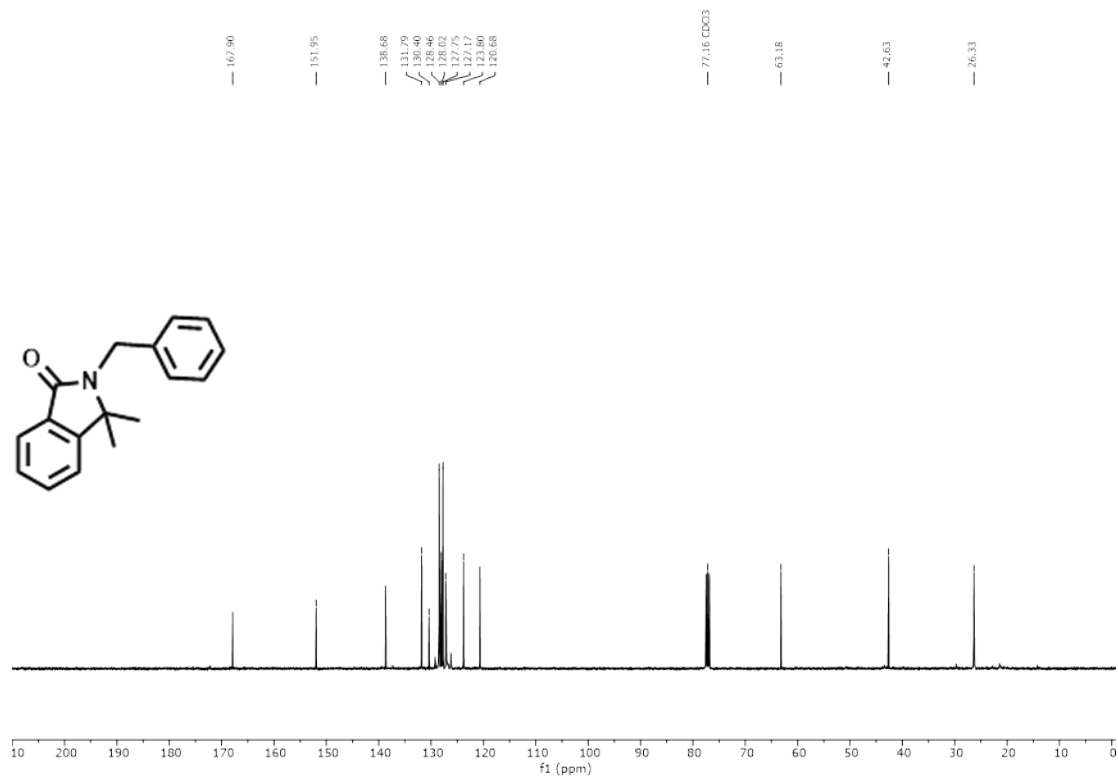

Figure S30. <sup>13</sup>C NMR spectrum (100 MHz) of 4c in CDCl<sub>3</sub>.

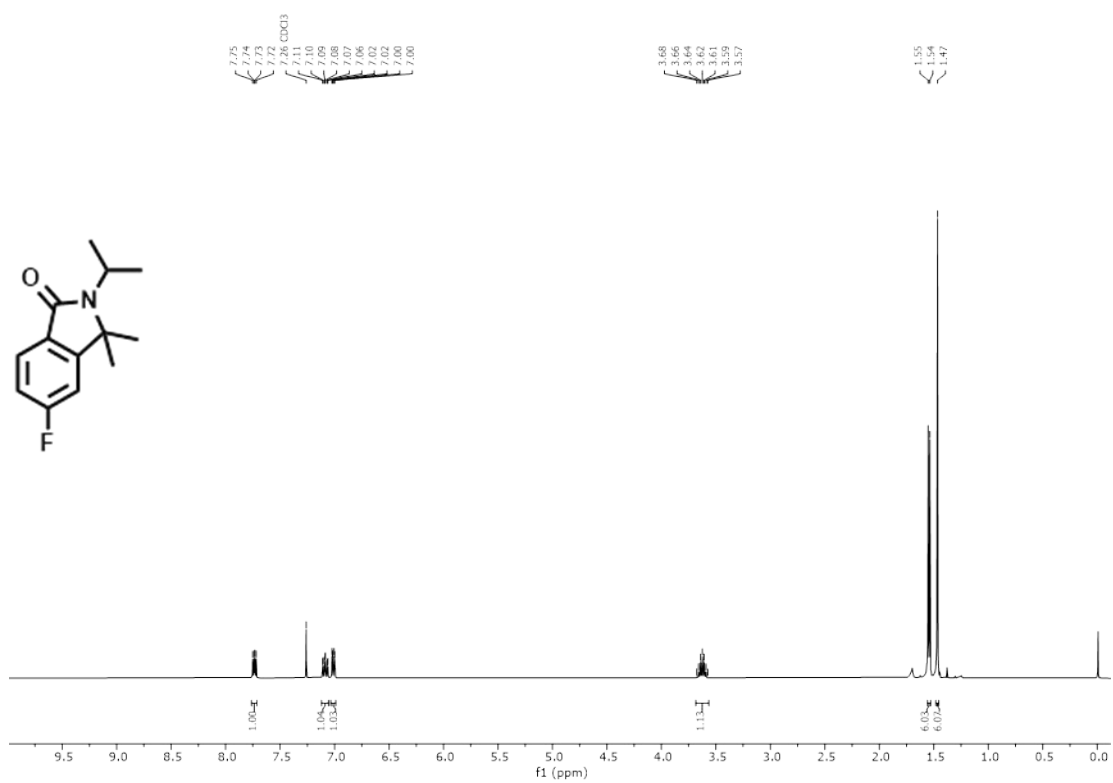

**Figure S31.** <sup>1</sup>H NMR spectrum (400 MHz) of 4d in CDCl<sub>3</sub>

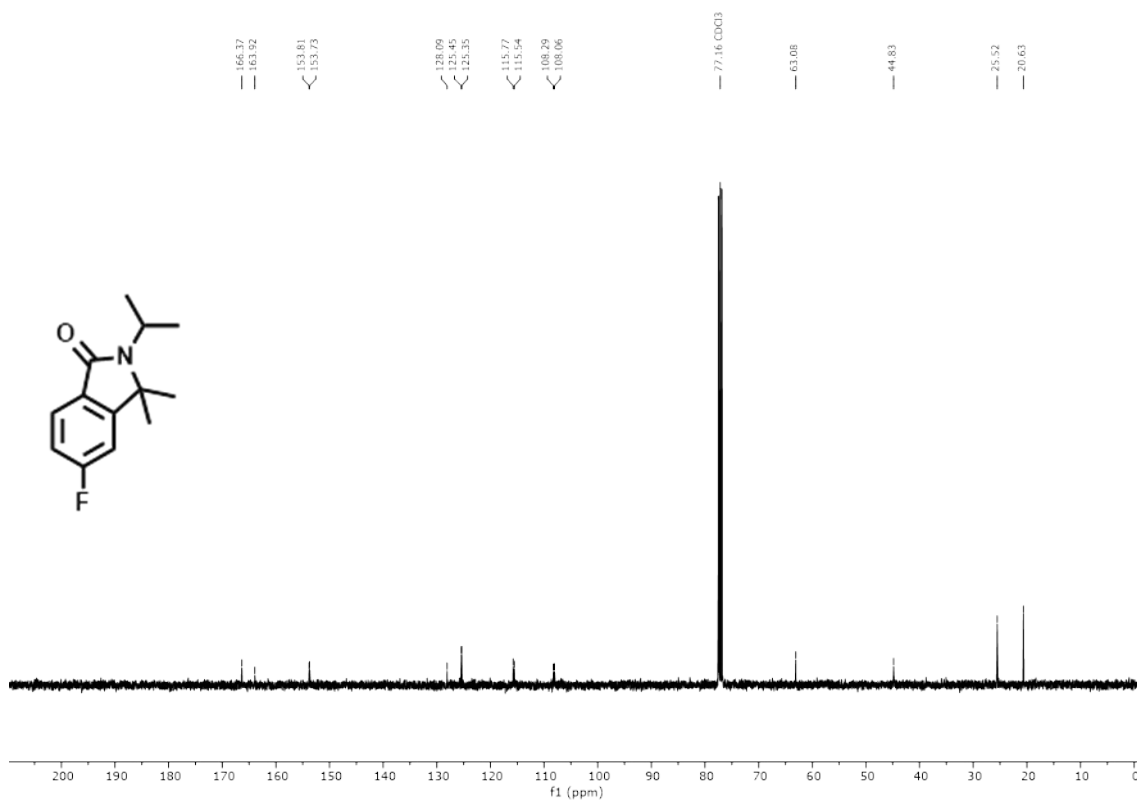

**Figure S32.** <sup>13</sup>C NMR spectrum (100 MHz) of 4d in CDCl<sub>3</sub>.

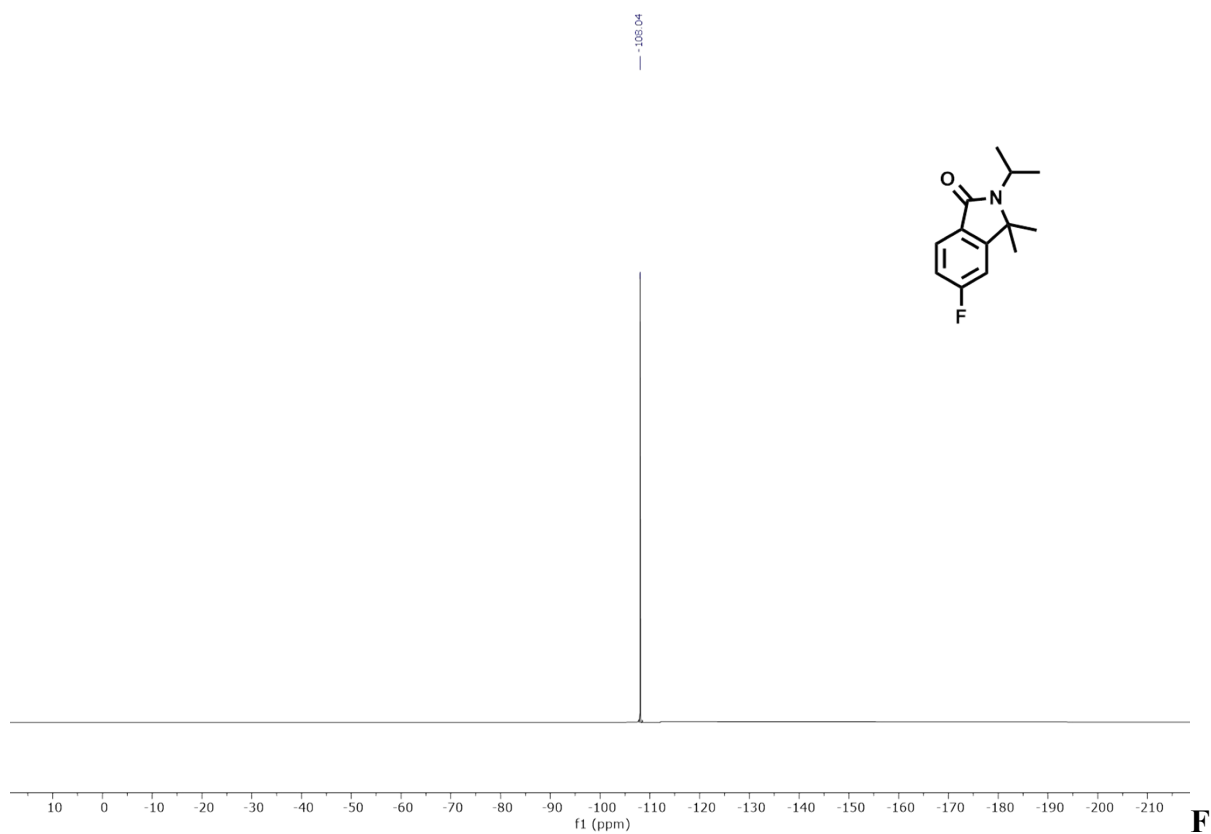

Figure S33.  $^{19}\text{F}$  NMR spectrum (376 MHz) of **4d** in  $\text{CDCl}_3$ .

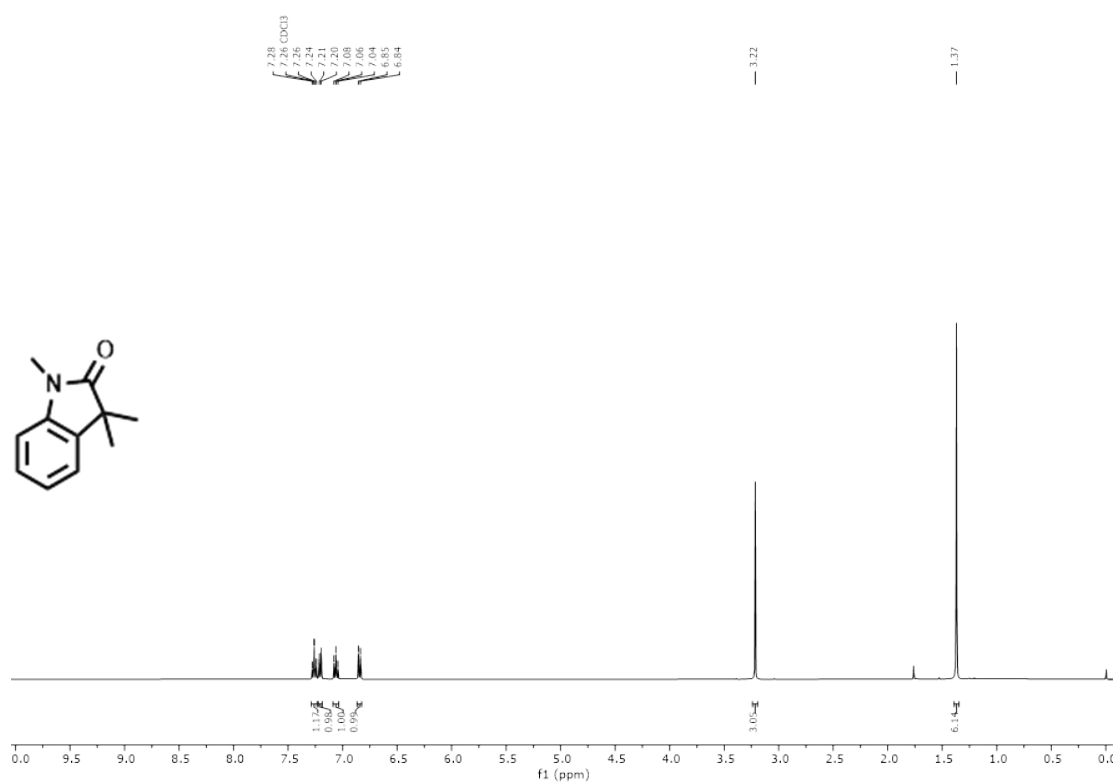

Figure S34.  $^1\text{H}$  NMR spectrum (400 MHz) of **6a** in  $\text{CDCl}_3$ .

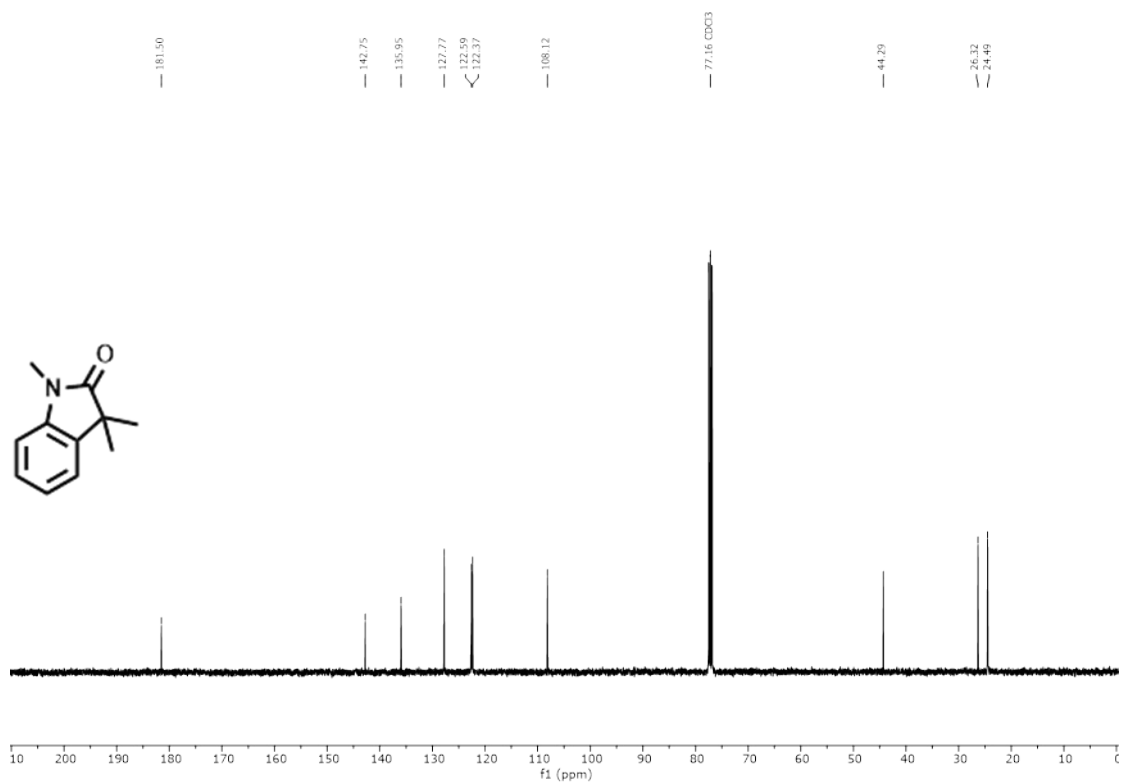

**Figure S35.**  $^{13}\text{C}$  NMR spectrum (100 MHz) of **6a** in  $\text{CDCl}_3$ .

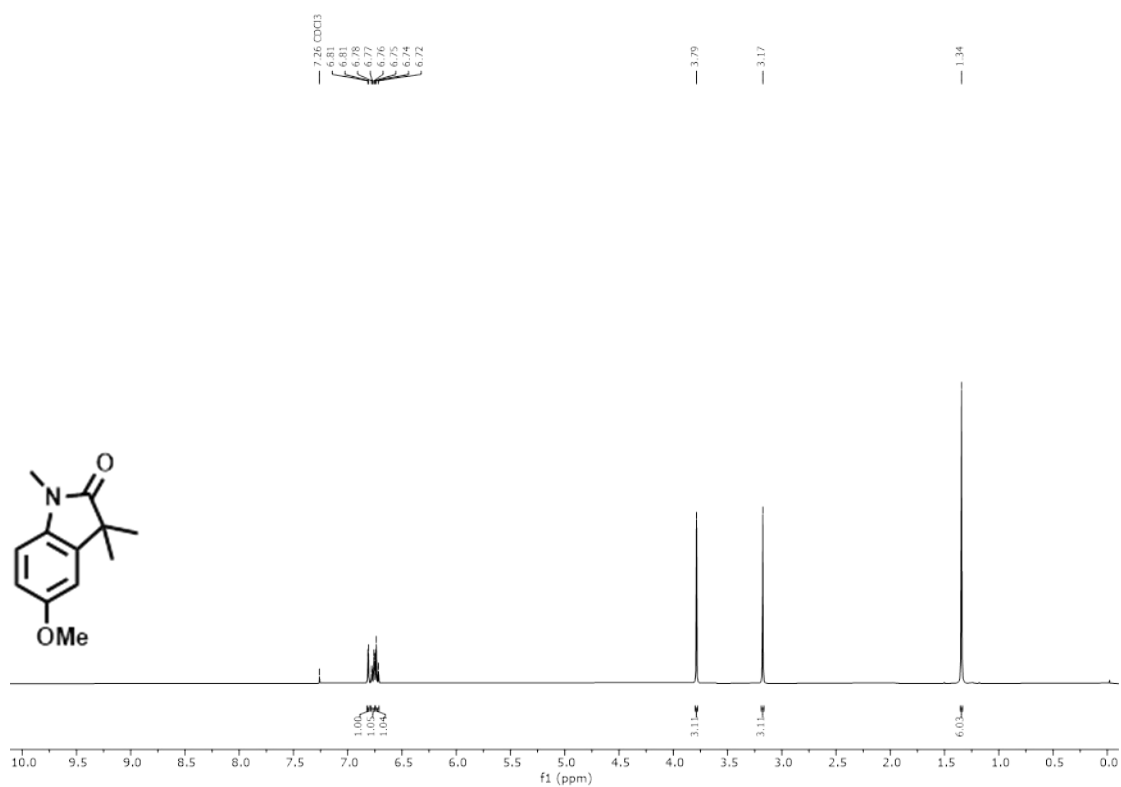

**Figure S36.**  $^1\text{H}$  NMR spectrum (400 MHz) of **6b** in  $\text{CDCl}_3$ .

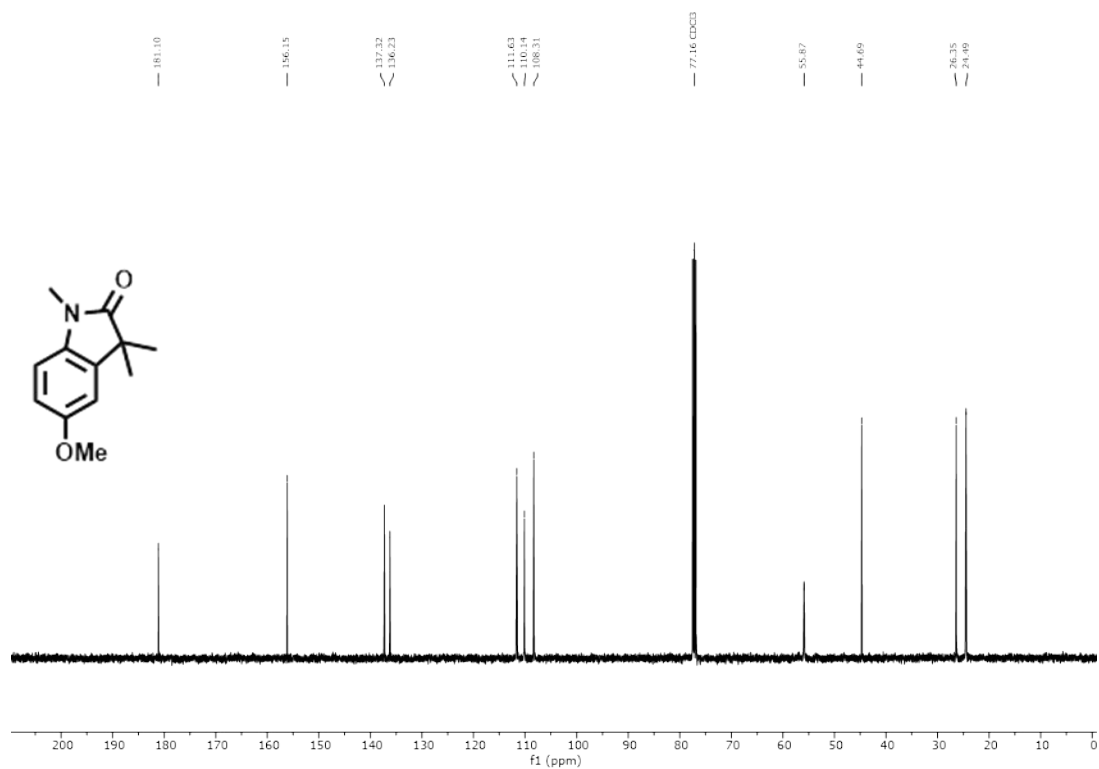

**Figure S37.**  $^{13}\text{C}$  NMR spectrum (100 MHz) of **6b** in  $\text{CDCl}_3$ .

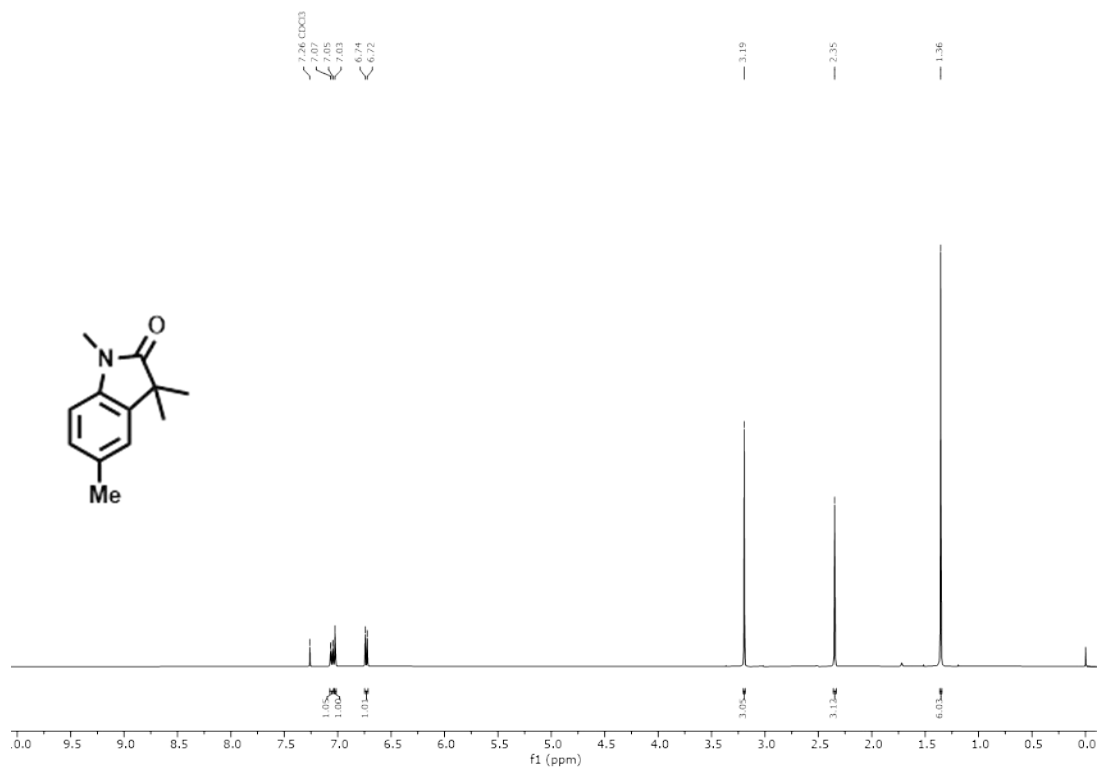

**Figure S38.**  $^1\text{H}$  NMR spectrum (400 MHz) of **6c** in  $\text{CDCl}_3$ .

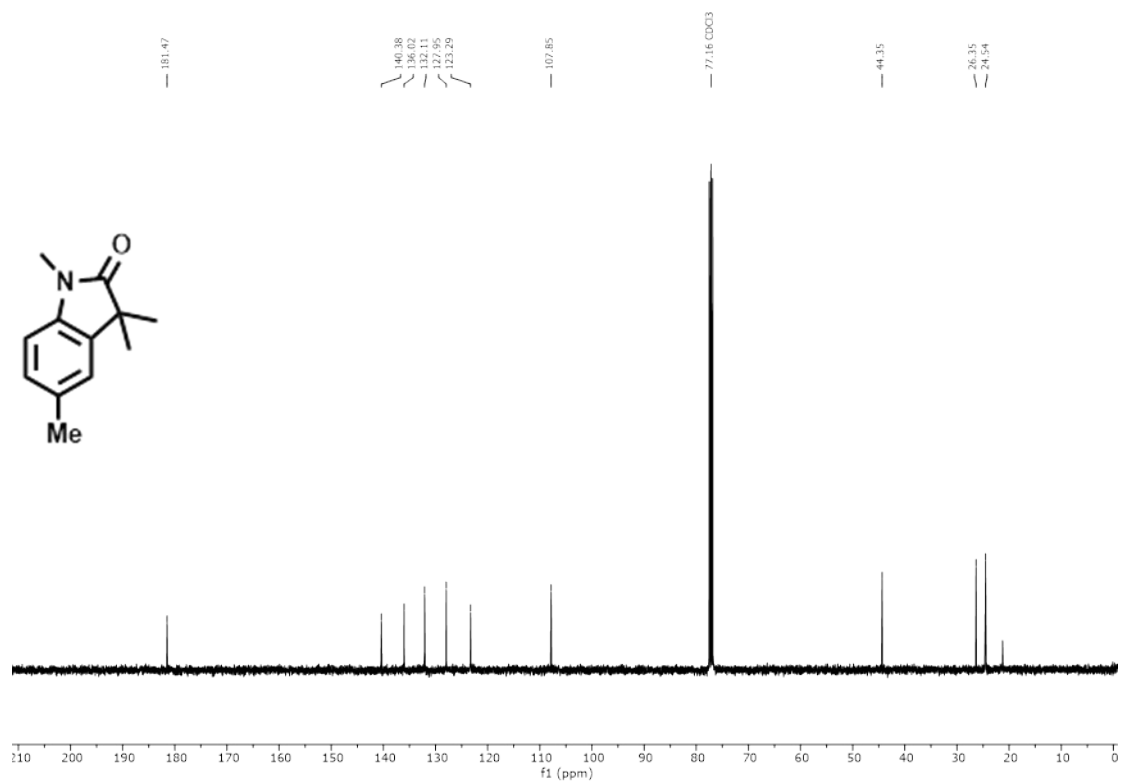

**Figure S39.**  $^{13}\text{C}$  NMR spectrum (100 MHz) of **6c** in  $\text{CDCl}_3$ .

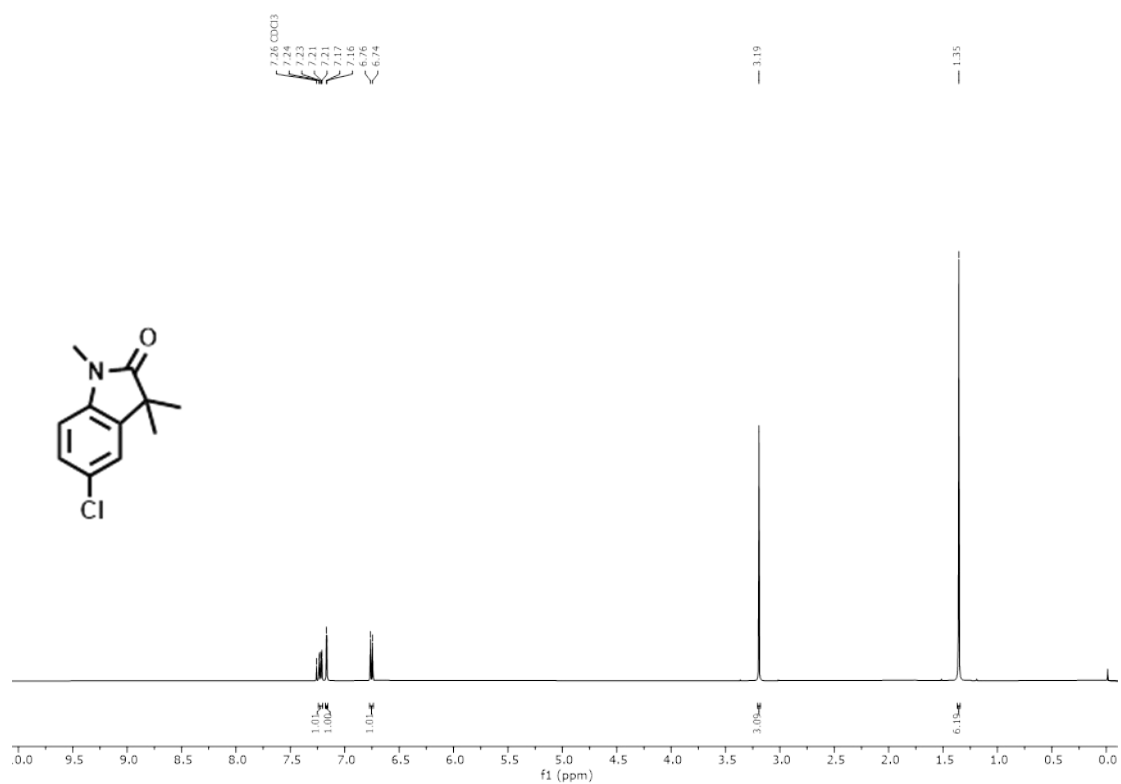

**Figure S40.**  $^1\text{H}$  NMR spectrum (400 MHz) of **6d** in  $\text{CDCl}_3$ .

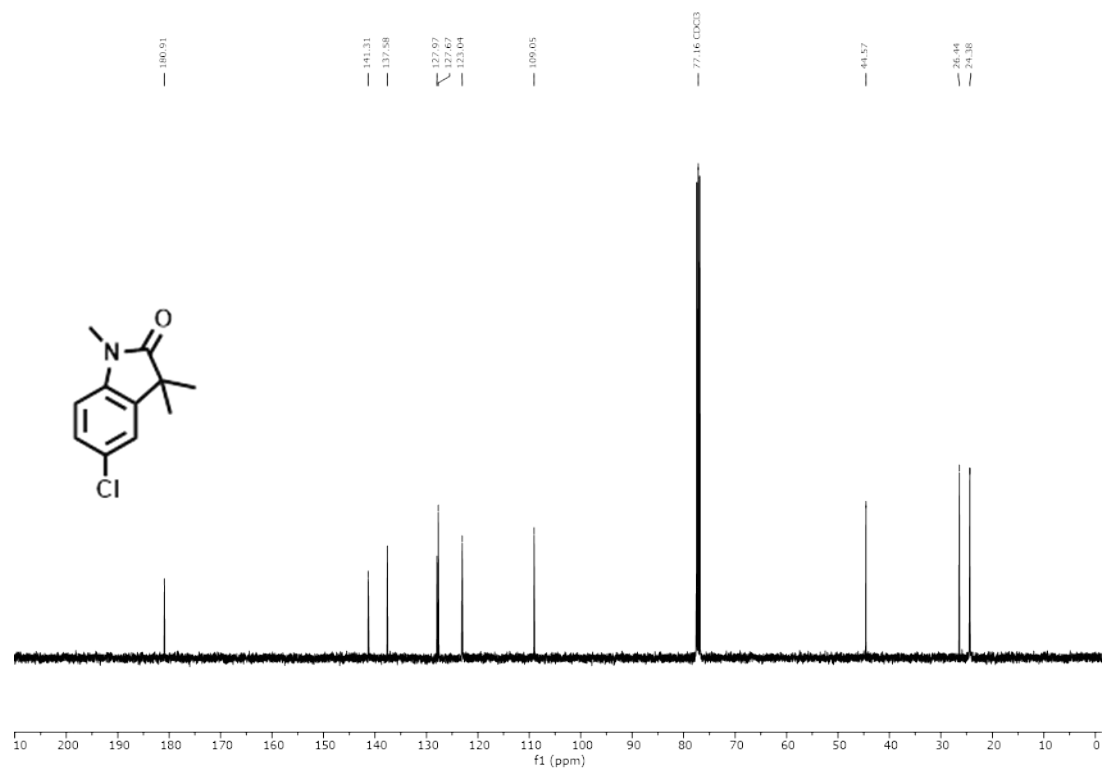

**Figure S41.**  $^{13}\text{C}$  NMR spectrum (100 MHz) of **6d** in  $\text{CDCl}_3$ .

**10.** Crystallographic data, bond length and bond angles of **7a** (CCDC no. 2285425).

|                   |                                                           |
|-------------------|-----------------------------------------------------------|
| Empirical formula | $\text{C}_{29}\text{H}_{43}\text{KN}_2\text{O}_7\text{S}$ |
| Formula weight    | 602.84                                                    |
| Temperature/K     | 150.0(1)                                                  |
| Crystal system    | Monoclinic                                                |
| Space group       | P 1 21/c 1                                                |
| a/Å               | 10.8580(3)                                                |
| b/Å               | 21.3088(6)                                                |
| c/Å               | 13.4896(4)                                                |
| $\alpha/^\circ$   | 90                                                        |
| $\beta/^\circ$    | 92.703(2)                                                 |



|                                                |                                                               |
|------------------------------------------------|---------------------------------------------------------------|
| $\gamma/^\circ$                                | 90                                                            |
| Volume/ $\text{\AA}^3$                         | 3117.63(15)                                                   |
| Z                                              | 4                                                             |
| $\rho_{\text{calc}}/\text{g/cm}^3$             | 1.284                                                         |
| $\mu/\text{mm}^{-1}$                           | 0.283                                                         |
| F(000)                                         | 1290.1                                                        |
| Crystal size/ $\text{mm}^3$                    | 0.2 x 0.2 x 0.2                                               |
| Radiation                                      | Mo K $\alpha$ ( $\lambda = 0.71073$ )                         |
| 2 $\Theta$ range for data collection/ $^\circ$ | 5.28 to 50                                                    |
| Index ranges                                   | $-12 \leq h \leq 12, -25 \leq k \leq 25, -16 \leq l \leq 16$  |
| Reflections collected                          | 27651                                                         |
| Independent reflections                        | 5474 [ $R_{\text{int}} = 0.0371, R_{\text{sigma}} = 0.0575$ ] |
| Data/restraints/parameters                     | 2854/0/203                                                    |
| Goodness-of-fit on $F^2$                       | 1.050                                                         |
| Final R indexes [ $I \geq 2\sigma(I)$ ]        | $R_1 = 0.0459, wR_2 = 0.1307$                                 |

Table 4: Bond Distances ( $\text{\AA}$ ) for **7a**

| Atom | Atom | Length/ $\text{\AA}$ | Atom | Atom | Length/ $\text{\AA}$ |
|------|------|----------------------|------|------|----------------------|
| K1   | S1   | 3.2310(8)            | N1   | C7   | 1.301(3)             |
| K1   | O1   | 2.7991(17)           | N1   | C8   | 1.396(3)             |
| K1   | O2   | 2.7804(17)           | N2   | C6   | 1.402(3)             |
| K1   | O3   | 2.9022(16)           | N2   | C7   | 1.392(3)             |
| K1   | O4   | 2.7382(17)           | C1   | C2   | 1.380(3)             |
| K1   | O5   | 2.8792(16)           | C1   | C6   | 1.400(3)             |
| K1   | O6   | 2.7214(16)           | C2   | C3   | 1.387(4)             |
| K1   | O7   | 2.8923(18)           | C3   | C4   | 1.373(4)             |
| K1   | C19  | 3.499(3)             | C4   | C5   | 1.391(3)             |
| K1   | C23  | 3.495(3)             | C5   | C6   | 1.402(3)             |
| K1   | C24  | 3.492(3)             | C8   | C9   | 1.398(4)             |
| S1   | C7   | 1.747(2)             | C8   | C13  | 1.393(3)             |
| O1   | C23  | 1.427(3)             | C9   | C10  | 1.389(4)             |

|    |     |          |     |     |          |
|----|-----|----------|-----|-----|----------|
| O1 | C24 | 1.431(3) | C10 | C11 | 1.377(4) |
| O2 | C21 | 1.426(3) | C11 | C12 | 1.391(4) |
| O2 | C22 | 1.422(3) | C12 | C13 | 1.381(4) |
| O3 | C19 | 1.424(3) | C14 | C15 | 1.497(4) |
| O3 | C20 | 1.430(3) | C16 | C17 | 1.504(4) |
| O4 | C17 | 1.420(3) | C18 | C19 | 1.495(4) |
| O4 | C18 | 1.420(3) | C20 | C21 | 1.495(3) |
| O5 | C15 | 1.434(3) | C22 | C23 | 1.499(4) |
| O5 | C16 | 1.427(3) | C24 | C25 | 1.501(4) |
| O6 | C14 | 1.422(3) | C26 | C27 | 1.481(4) |
| O6 | C25 | 1.423(3) | C27 | C28 | 1.461(5) |
| O7 | C26 | 1.416(3) | C28 | C29 | 1.496(5) |
| O7 | C29 | 1.430(3) |     |     |          |

Table 5: Bond Angles (Degrees) for **7a**

| Atom | Atom | Atom | Angle/°   | Atom | Atom | Atom | Angle/°    |
|------|------|------|-----------|------|------|------|------------|
| O1   | K1   | S1   | 87.18(4)  | C22  | O2   | K1   | 115.44(13) |
| O2   | K1   | S1   | 95.39(4)  | C22  | O2   | C21  | 112.13(19) |
| O2   | K1   | O1   | 61.51(5)  | C19  | O3   | K1   | 102.52(13) |
| O3   | K1   | S1   | 111.62(3) | C20  | O3   | K1   | 113.46(13) |
| O3   | K1   | O1   | 119.24(5) | C20  | O3   | C19  | 112.65(18) |
| O3   | K1   | O2   | 59.62(5)  | C17  | O4   | K1   | 119.47(14) |
| O4   | K1   | S1   | 97.74(4)  | C18  | O4   | K1   | 120.42(14) |
| O4   | K1   | O1   | 175.06(5) | C18  | O4   | C17  | 112.69(19) |
| O4   | K1   | O2   | 118.13(5) | C15  | O5   | K1   | 110.88(13) |
| O4   | K1   | O3   | 59.31(5)  | C16  | O5   | K1   | 110.61(14) |
| O5   | K1   | S1   | 103.34(3) | C16  | O5   | C15  | 110.20(18) |
| O5   | K1   | O1   | 118.22(5) | C14  | O6   | K1   | 120.55(13) |
| O5   | K1   | O2   | 161.26(5) | C25  | O6   | K1   | 118.76(14) |
| O5   | K1   | O3   | 112.57(5) | C25  | O6   | C14  | 113.08(18) |
| O5   | K1   | O4   | 60.32(5)  | C26  | O7   | K1   | 108.77(15) |
| O6   | K1   | S1   | 83.56(4)  | C29  | O7   | K1   | 116.67(16) |

|     |    |     |           |     |     |     |            |
|-----|----|-----|-----------|-----|-----|-----|------------|
| O6  | K1 | O1  | 61.01(5)  | C29 | O7  | C26 | 108.4(2)   |
| O6  | K1 | O2  | 122.50(5) | C8  | N1  | C7  | 121.35(19) |
| O6  | K1 | O3  | 164.74(5) | C7  | N2  | C6  | 130.49(18) |
| O6  | K1 | O4  | 118.95(5) | C6  | C1  | C2  | 121.4(2)   |
| O6  | K1 | O5  | 60.15(5)  | C3  | C2  | C1  | 120.4(2)   |
| O7  | K1 | S1  | 164.50(4) | C4  | C3  | C2  | 118.9(2)   |
| O7  | K1 | O1  | 77.37(5)  | C5  | C4  | C3  | 121.8(2)   |
| O7  | K1 | O2  | 76.30(5)  | C6  | C5  | C4  | 119.8(2)   |
| O7  | K1 | O3  | 75.75(5)  | C1  | C6  | N2  | 117.42(19) |
| O7  | K1 | O4  | 97.72(5)  | C5  | C6  | N2  | 124.7(2)   |
| O7  | K1 | O5  | 85.31(5)  | C5  | C6  | C1  | 117.8(2)   |
| O7  | K1 | O6  | 89.90(5)  | N1  | C7  | S1  | 127.69(18) |
| C19 | K1 | S1  | 94.99(5)  | N2  | C7  | S1  | 113.89(15) |
| C19 | K1 | O1  | 137.48(6) | N2  | C7  | N1  | 118.39(19) |
| C19 | K1 | O2  | 76.03(6)  | C9  | C8  | N1  | 119.0(2)   |
| C19 | K1 | O3  | 23.41(5)  | C13 | C8  | N1  | 122.8(2)   |
| C19 | K1 | O4  | 42.79(6)  | C13 | C8  | C9  | 117.8(2)   |
| C19 | K1 | O5  | 102.59(6) | C10 | C9  | C8  | 120.6(3)   |
| C19 | K1 | O6  | 161.47(6) | C11 | C10 | C9  | 121.1(3)   |
| C19 | K1 | O7  | 95.61(6)  | C12 | C11 | C10 | 118.6(2)   |
| C23 | K1 | S1  | 79.18(6)  | C13 | C12 | C11 | 120.7(3)   |
| C23 | K1 | O1  | 22.97(6)  | C12 | C13 | C8  | 121.2(2)   |
| C23 | K1 | O2  | 42.37(6)  | C15 | C14 | O6  | 108.32(19) |
| C23 | K1 | O3  | 101.99(6) | C14 | C15 | O5  | 110.43(19) |
| C23 | K1 | O4  | 158.78(6) | C17 | C16 | O5  | 109.9(2)   |
| C23 | K1 | O5  | 140.90(6) | C16 | C17 | O4  | 109.0(2)   |
| C23 | K1 | O6  | 81.79(6)  | C19 | C18 | O4  | 109.7(2)   |
| C23 | K1 | O7  | 86.01(7)  | O3  | C19 | K1  | 54.07(11)  |
| C23 | K1 | C19 | 116.18(7) | C18 | C19 | K1  | 84.38(14)  |
| C24 | K1 | S1  | 73.35(5)  | C18 | C19 | O3  | 108.6(2)   |
| C24 | K1 | O1  | 23.11(6)  | C21 | C20 | O3  | 109.29(18) |
| C24 | K1 | O2  | 81.90(6)  | C20 | C21 | O2  | 107.1(2)   |
| C24 | K1 | O3  | 141.30(6) | C23 | C22 | O2  | 108.0(2)   |
| C24 | K1 | O4  | 159.20(6) | O1  | C23 | K1  | 49.96(11)  |

|     |    |     |            |     |     |     |           |
|-----|----|-----|------------|-----|-----|-----|-----------|
| C24 | K1 | O5  | 102.73(6)  | C22 | C23 | K1  | 82.80(14) |
| C24 | K1 | O6  | 42.59(6)   | C22 | C23 | O1  | 108.5(2)  |
| C24 | K1 | O7  | 92.35(6)   | O1  | C24 | K1  | 50.15(11) |
| C24 | K1 | C19 | 153.98(7)  | C25 | C24 | K1  | 82.96(14) |
| C24 | K1 | C23 | 39.74(6)   | C25 | C24 | O1  | 108.2(2)  |
| C7  | S1 | K1  | 90.42(7)   | C24 | C25 | O6  | 108.1(2)  |
| C23 | O1 | K1  | 107.08(14) | C27 | C26 | O7  | 107.5(3)  |
| C24 | O1 | K1  | 106.75(14) | C28 | C27 | C26 | 107.0(3)  |
| C24 | O1 | C23 | 112.38(19) | C29 | C28 | C27 | 105.9(3)  |
| C21 | O2 | K1  | 113.58(12) | C28 | C29 | O7  | 106.2(2)  |

## 11. References

1. J. Ahmed, S. Chakraborty, S. P. Jose, and S. K. Mandal, Integrating Organic Lewis Acid and Redox Catalysis: The Phenalenyl Cation in Dual Role, *J. Am. Chem. Soc.* 2018, **140**, 8330–8339.
2. I. Fujii, K. Semba and Y. Nakao, The Kumada–Tamao–Corriu Coupling Reaction Catalyzed by Rhodium–Aluminum Bimetallic Complexes, *Org. Lett.* 2022, **24**, 3075-3079.
3. M. J. West and A. J. B. Watson, Ni vs. Pd in Suzuki–Miyaura  $sp^2$ – $sp^2$  cross-coupling: a head-to-head study in a comparable precatalyst/ligand system, *Org. Biomol. Chem.*, 2019, **17**, 5055-5059.
4. W. Liu, H. Cao, H. Zhang, H. Zhang, K. H. Chung, C. He, H. Wang, F. Y. Kwong, and A. Lei, Organocatalysis in Cross-Coupling: DMEDA-Catalyzed Direct C–H Arylation of Unactivated Benzene, *J. Am. Chem. Soc.* 2010, **132**, 16737-16740.
5. C. Dunst, and P. Knochel, Selective Mg Insertion into Substituted Mono- and Dichloro Arenes in the Presence of LiCl: A New Preparation of Boscalid, *Synlett*, 2011, **14**, 2064-2068.
6. K. Chen, W. Chen, X. Yi, W. Chen, M. Liu and H. Wu, Sterically hindered N-heterocyclic carbene/palladium(II) catalyzed Suzuki–Miyaura coupling of nitrobenzenes, *Chem. Commun.*, 2019, **55**, 9287-9290.

7. L. Liu, K. Zhao, W. Li, M. Liu, Y. Chen, Y. Dong, Synthesis of heterobiaryls via Suzuki-Miyaura coupling reaction of potassium aryltrifluoroborates with heteroaryl halides in aqueous systems, *Appl. Organometal Chem.* 2019, **33**, e4831.
8. M. C. Cecotka, J. Predygier, S. Crespi, J. Szczepanik, M. Giedyk, Photocatalysis in Aqueous Micellar Media Enables Divergent C–H Arylation and N-Dealkylation of Benzamides, *ACS Catal.* 2022, **12**, 3543–3549.
9. B. S. Bhakuni, A. Yadav, S. Kumar, S. Patel, S. Sharma, S. Kumar, KO(t)Bu-mediated synthesis of dimethylisoindolin-1-ones and dimethyl-5-phenylisoindolin-1-ones: selective C–C coupling of an unreactive tertiary sp<sup>3</sup> C–H bond, *J. Org. Chem.* 2014, **79**, 2944–2954.
10. W. C. Wertjes, L. C. Wolfe, P. J. Waller, D. Kalyani, Nickel or Phenanthroline Mediated Intramolecular Arylation of sp<sup>3</sup> C–H Bonds Using Aryl Halides, *Org. Lett.* 2013, **15**, 5986–5989.
11. S. Wu, Q. Zhao, C. Wu, C. Wang, H. Lei, Transition-metal-free oxindole synthesis: quinone–K<sub>2</sub>CO<sub>3</sub> catalyzed intramolecular radical cyclization, *Org. Chem. Front.*, 2022, **9**, 2593–2599.
12. W. Zhang, Y. Yue, D. Yu, L. Song, Y. Y. Xu, Y. J. Tian, Y. J. Guo, 1,10-phenanthroline-catalyzed tandem reaction of 2-iodoanilines with isothiocyanates in water, *Adv. Synth. Catal.* 2012, **354**, 2283 – 2287
